# Supplementary material for: Structural basis for the recognition of sulfur in phosphorothioated DNA
Source: PubMed Central journal article supplement (PMC6224610; doi:10.1038/s41467-018-07093-1), 2018-11-08
Supplement: 41467_2018_7093_MOESM1_ESM.pdf [file 41467_2018_7093_MOESM1_ESM.pdf]

**Structural basis for the recognition of sulfur in phosphorothioated DNA**

Liu *et al.*

Supplementary Information

## Supplementary Discussion

### **Why a sulfur atom behaves differently than an oxygen atom and how their difference can lead to specific recognition of the sulfur in PT-DNA**

Sulfur and oxygen belong to the same group (group VIA) in the periodic table. The outmost shell electron configuration of oxygen is  $2s^22p^4$ , and the outmost shell electron configuration of sulfur is  $3s^23p^4$ . They both tend to attract two electrons to make their outmost shell electron configuration become  $ns^2np^6$  ( $2s^22p^6$  for oxygen and  $3s^23p^6$  for sulfur, respectively). When oxygen forms a covalent bond with phosphorus in normal DNA, it would attract one electron from the phosphorus atom and one electron from the counter-cation (usually  $\text{Na}^+$  in physiological condition) to become negatively charged. Sulfur does the same thing. When sulfur forms a covalent bond with phosphorus in PT-DNA, it would attract one electron from the phosphorus atom and one electron from the counter-cation. However, sulfur is much bigger than oxygen. The atomic radius of oxygen is estimated to be 48 picometer while the atomic radius of sulfur is estimated to be 88 picometer. Hence the electronegativity of sulfur is much less than that of oxygen, being 2.58 compared to 3.44 for that of oxygen by the Pauling scale<sup>37</sup>. Therefore, sulfur in PT-DNA carries much less negative charge than oxygen in normal DNA, although it still does carry negative charge and thus can form a salt bridge with the positively charged R117 of ScoMcrA.

Hydrophobicity/hydrophilicity (hydro- means water) is determined by whether an atom (or a molecule) can form hydrogen bond with water or not. Oxygen is highly

electronegative, and thus it carries enough negative charge to form hydrogen bonds with water, and behaves as hydrophilic. In contrast, sulfur is not that electronegative, and it does not possess enough negative charge to form hydrogen bonds with water. Therefore, it behaves as hydrophobic. For example, serine is hydrophilic whereas cysteine (with one oxygen-to-sulfur replacement compared with serine) is much more hydrophobic than serine, and methionine (which contains a sulfur atom) is certainly hydrophobic.

In summary, compared with oxygen in normal DNA, the sulfur atom in PT-DNA is much more hydrophobic. At the same time, it is negatively charged, although the negative charge it carries is much less than that of oxygen. Therefore, it is no surprise that ScoMcrA-SBD employs a hydrophobic pocket to selectively recognize the sulfur atom in PT-DNA, but not the oxygen atom in normal DNA. At the same time, the sulfur atom in PT-DNA is still negatively charged and can form salt bridge with strongly positively charged residues such as R117.

**Cleavage by the ScoMcrA HNH domain occurs at a distance of ~23 bp away from the phosphorothioate linkage at the 5' side of G<sub>PS</sub>GCC**

In a previous work, we detected multiple cleavages of variable efficiency (rectangle in dashed line, **Supplementary Fig. 23a**) flanking the symmetric G<sub>PS</sub>GCC site by sequencing the cleaved products of a 118 bp 5'-radiolabeled DNA duplex on which the GGCC sites on both strands are phosphorothioated<sup>14</sup>. These results kept it unknown about the orientation of the cleavage sites with respect to the sequence of PT

site for one given DNA molecule. In this regard, 107 bp hemi-PT-DNA on either of strand as well as the full-PT-DNA were synthesized according to the sequence of an internal region of the 118 bp DNA duplex as the substrates for ScoMcrA cleavage assay. Given the cleavage flexibility of ScoMcrA, we use the cleavage site with the highest cut frequency (panel a, rectangle in dashed line) to depict the location of cleavage as well as the length of the cleaved fragments with respect to the PT link. As shown in **Supplementary Fig. 23b**, the DNA duplex of 107 bp that is hemi-phosphorothioated on the top strand was cleaved into two distinct fragments by ScoMcrA, one being ~21 bp, and the other being ~86 bp (**Supplementary Fig. 23b**, lane 3), demonstrating that the cleavage occurred ~20 bp away from the 5' side of G<sub>PS</sub>GCC. Similarly, the hemi-PT-DNA on the bottom strand yielded two fragments of ~68 bp and ~39 bp (**Supplementary Fig. 23b**, lane 4), indicative of cleavage at a distance of ~25 bp away from the PT linkage at the 5' side. By comparison, the fully phosphorothioated DNA on both strands gave a weak band of ~47 bp in addition to the four fragments generated for the hemi-PT-DNA. The length of this new band is exactly in accordance with that of the fragment with dual cuts at flanking sides of G<sub>PS</sub>GCC/G<sub>PS</sub>GCC. Cleavage of the hemi-PT-DNA in this result demonstrated that by employing its SBD domain to bind to the G<sub>PS</sub>GCC site, ScoMcrA orients its HNH domain at the 5' side of the PT site. The distance between the cleavage sites and PT link for the top and bottom hemi-PT DNA is different, we hypothesize it is possibly due to the DNA sequence specificity of HNH motif of ScoMcrA. DNA sequence specificity for HNH motifs has been reported in I-HumI<sup>1</sup>, PacI<sup>2</sup>, as well as some HNH

Endonucleases from phage or prophages without cognate recognition domain<sup>3</sup>. The much lower intensity of the 47 bp fragment indicates that most of the DNA molecules are cut only once at either side of PT modification site. The vast majority of DNA molecules is completely uncut, so the chances of getting dual cut molecules is quite low, since the percentage of molecules cut even once is already quite small.

### **A model of full-length ScoMcrA dimer recognition and cleavage of PT-DNA**

If we compare the structure of one protomer of full-length ScoMcrA and that of the SBD-SRA fragment in complex with PT-DNA, they can be superimposed onto each other very well, with a root-mean-square-deviation (RMSD) value of 0.453 Å for 263 atoms being compared (**Supplementary Fig. 24a**). However, if we compare the structures of dimeric full-length ScoMcrA (**Supplementary Fig. 24b**) and dimeric SBD-SRA fragment in complex with PT-DNA (**Supplementary Fig. 24c**), we find that their dimeric arrangements are different. A conformational change is needed for ScoMcrA to rearrange its dimeric assembly upon interaction with PT-DNA (**Supplementary Fig. 24d**).

Using the structure of full-length ScoMcrA and that of the SBD-SRA fragment in complex with PT-DNA, we constructed a model of full-length ScoMcrA dimer in complex with PT-DNA (**Supplementary Fig. 25**). In this model, the residues of the SBD domain from one protomer responsible for phosphorothioate binding such as H116, R117, and P165 (magenta sticks in **Supplementary Fig. 25**), the active site residues H508, N522, and H531 of the HNH domain from the same ScoMcrA

protomer (orange sticks in **Supplementary Fig. 25**), and the active site residues H508', N522', and H531' of the HNH' domain from the other ScoMcrA protomer (red sticks in **Supplementary Fig. 25**) are all accessible, and they can interact with PT-DNA at the same time in this dimeric configuration. The distance between the SBD-recognition site and the HNH'-contact site on PT-DNA is about 20 base pairs. Therefore, we propose that the full-length ScoMcrA dimer employs the SBD domain of one ScoMcrA protomer to recognize the sulfur atom as well as the G<sub>PS</sub>GCC core motif, and uses the HNH and HNH' domains of both ScoMcrA protomers to cleave the two strands of PT-DNA ~20 base pairs away from the SBD-recognition site. This model is fully consistent with our in vitro cleavage assay result (**Supplementary Fig. 23**), and implies that the dimeric organization of ScoMcrA is essential for its biological activity.

If we model two ScoMcrA–SBD domains on the same DNA, their SRGRR loops would clash with each other (**Supplementary Fig. 26a**). In addition, when we measured the binding affinity ( $K_d$ ) of ScoMcrA–SBD for singly and doubly phosphorothioated DNA, we found that these two  $K_d$  values are very similar (**Supplementary Fig. 26b**). Therefore, most likely two ScoMcrA molecules would not bind to two strands of one DNA at the same time. However, the SRGRR loop of ScoMcrA–SBD is quite divergent in SBD homologues from other bacteria, thus we cannot exclude the scenario that other SBD homologues can have two molecules bound to the same DNA at the same time.

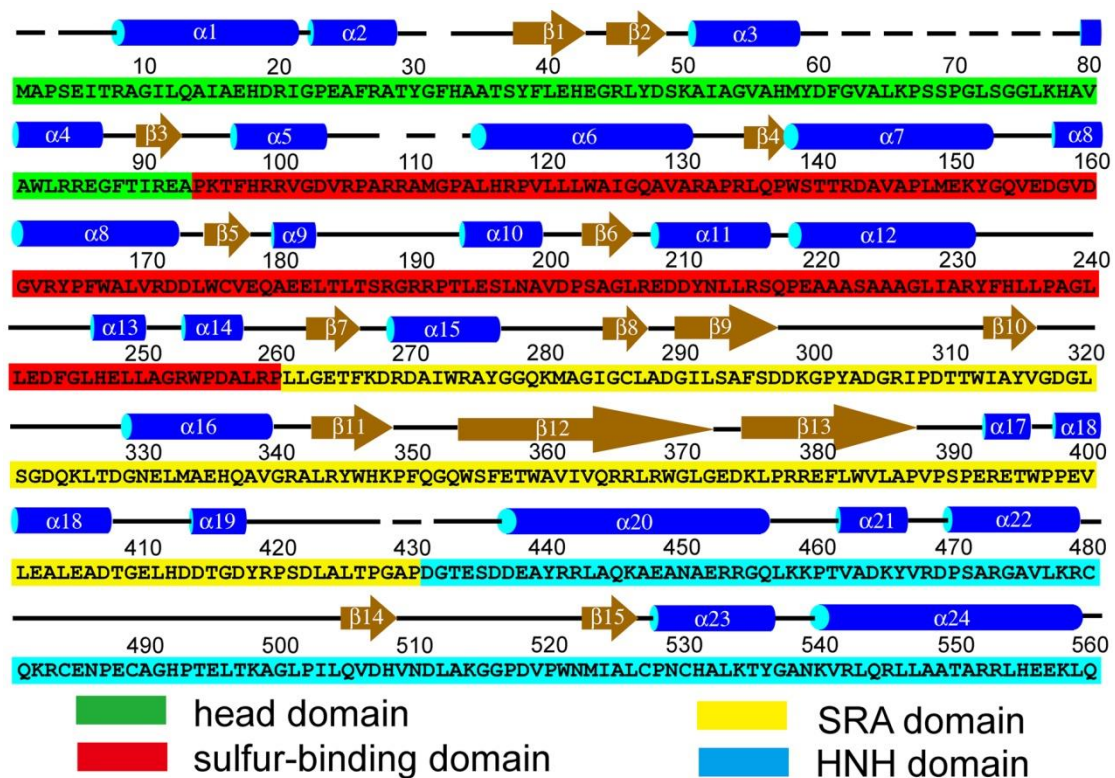

Supplementary Figure 1.

**Secondary structure organization of ScoMcrA.** The head, SBD, SRA, and

HNH domains of ScoMcrA are shaded in green, red, yellow, and cyan, respectively.

Residues with poor electron density and not included in the final model are indicated

by dashed lines.

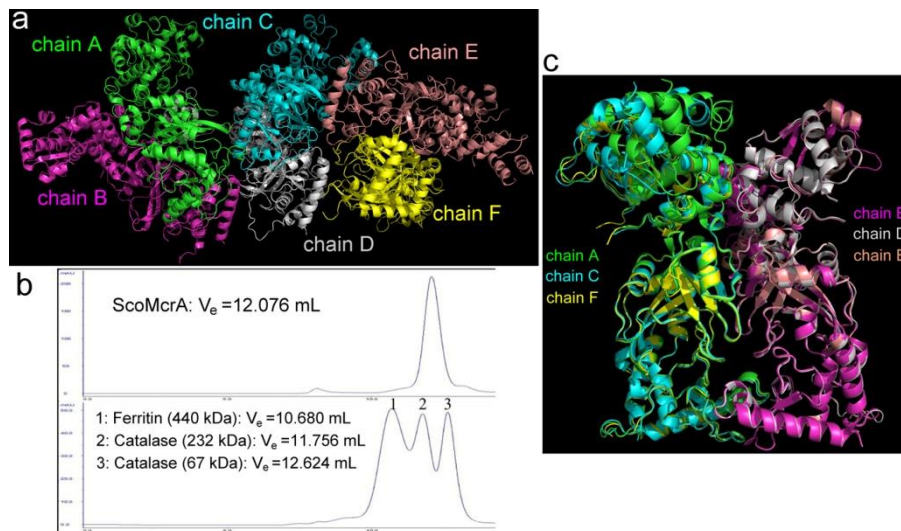

## Supplementary Figure 2.

**Three ScoMcrA dimers are present in the asymmetric unit of the structure of full-length (FL) ScoMcrA alone.** (a) There are six molecules of ScoMcrA in the asymmetric unit of the FL ScoMcrA structure, colored in green, magenta, cyan, grey, wheat, and yellow for chains A, B, C, D, E, and F, respectively. They are assembled into three dimers: A-B pair, C-D pair, and E-F pair. (b) ScoMcrA forms a dimer in solution. The elution profile of FL ScoMcrA from Superdex 200 gel filtration chromatography is shown. The elution volumes of standard protein molecular weight markers are also indicated. Theoretical molecular weights for a monomer and a dimer of ScoMcrA are 62.08 kDa and 124.15 kDa, respectively. (c) Comparison of the three dimers of ScoMcrA (A-B pair, C-D pair, and E-F pair) in the asymmetric unit.



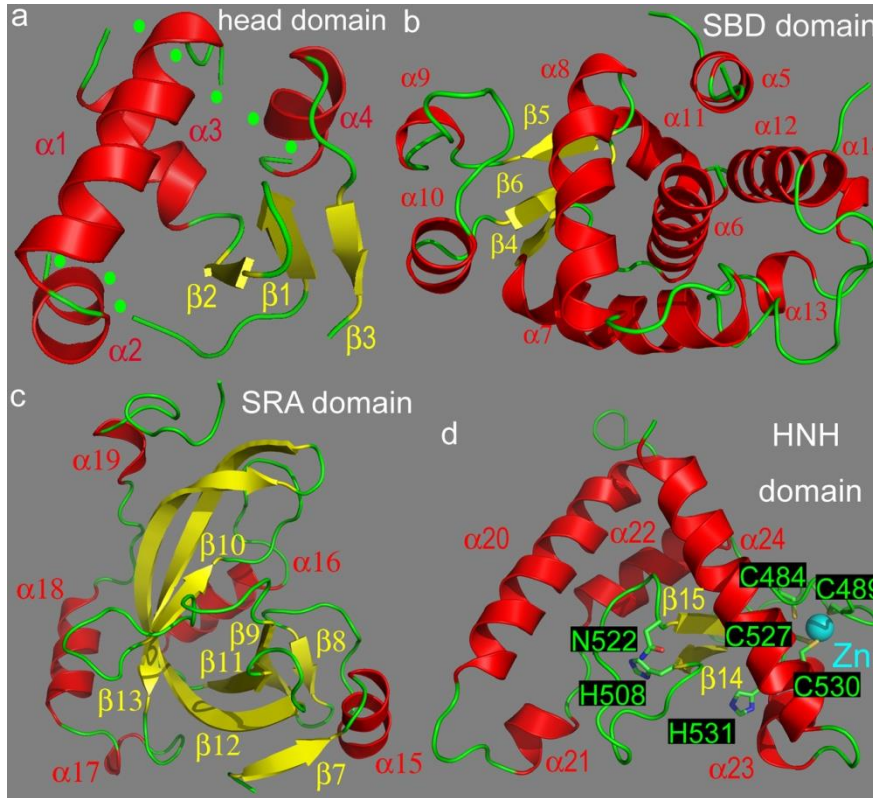

**Supplementary Figure 3.**

**Structures of the four individual domains of ScoMcrA.** (a) Structure of the head domain of ScoMcrA.  $\alpha$  helices,  $\beta$  strands, and loops are colored in red, yellow, and green, respectively. Secondary structure elements are labeled. Residues with poor electron density and thus not included in the final model are indicated with green dotted lines. (b) Structure of the SBD domain of ScoMcrA. (c) Structure of the SRA domain of ScoMcrA. (d) Structure of the HNH domain of ScoMcrA. Side chains of the active site residues H508, N522, and H531 critical for the endonuclease activity of ScoMcrA and the zinc-chelating residues C484, C489, C527, and C530 are shown. Carbon, nitrogen, oxygen, and sulfur atoms are colored in green, blue, red, and gold, respectively. The zinc ion associated with the HNH domain is shown as a cyan sphere.

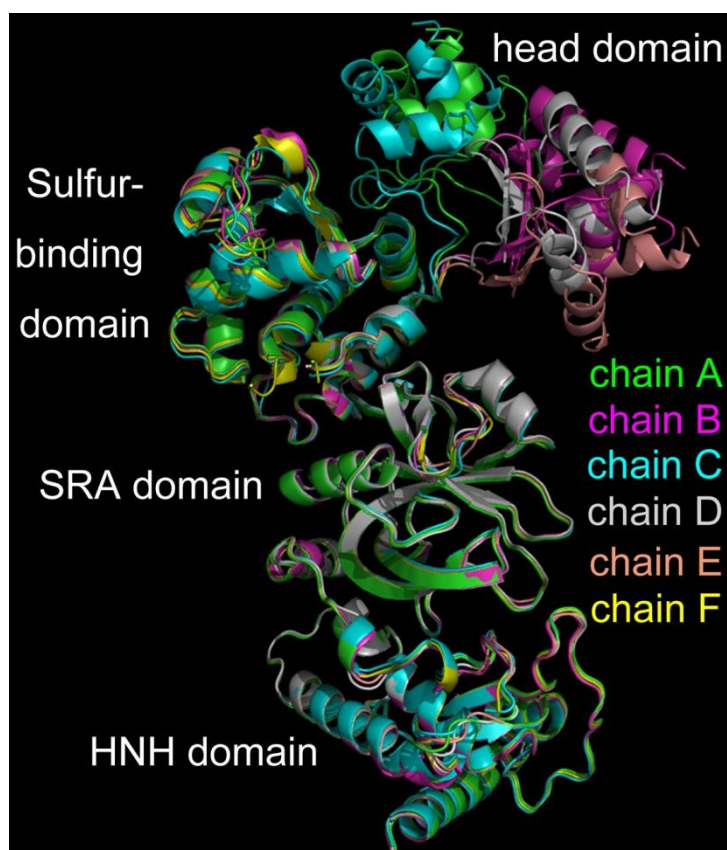

**Supplementary Figure 4.**

**The head domain is highly flexible with respect to the rest of the ScoMcrA molecule.** The six molecules of ScoMcrA in the asymmetric unit of the FL ScoMcrA structure are superimposed. The SBD domains, SRA domains, and HNH domains of the six molecules can be superimposed relatively well, whereas the positions of the head domains from different ScoMcrA molecules exhibit considerable variations. Note that there is also some limited flexibility between the SBD domain and the SRA domain, as well as between the SRA domain and the HNH domain.

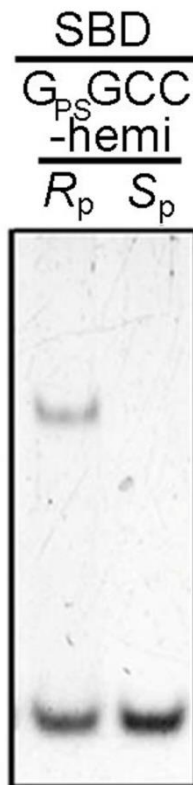

**Supplementary Figure 5.**

**The SBD domain of ScoMcrA interacts specifically with the *R<sub>p</sub>*, but not the *S<sub>p</sub>*, form of hemi-phosphorothioated DNA.**

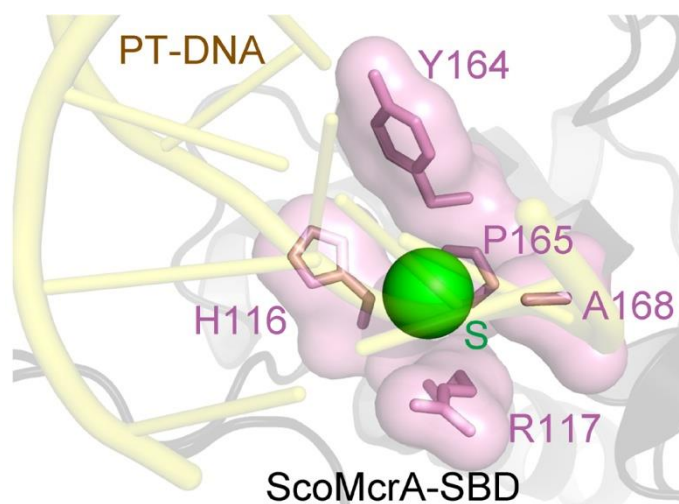

**Supplementary Figure 6.**

**View of the sulfur-binding cavity of ScoMcrA-SBD from the top.**

Sulfur-recognizing residues of ScoMcrA-SBD are shown in stick as well in surface representations.

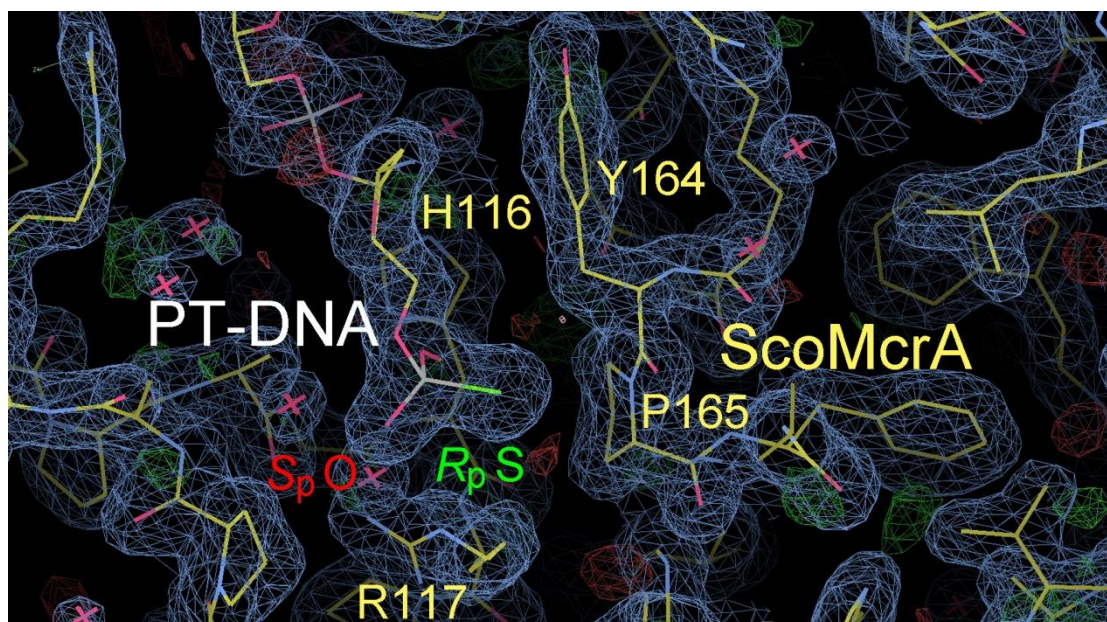

**Supplementary Figure 7.**

**A portion of the electron density map of ScoMcrA–SBD in complex with PT-DNA around the  $R_p$  sulfur atom and the  $S_p$  oxygen atom.** The  $2F_o - F_c$  electron density map around the  $R_p$  sulfur atom and the  $S_p$  oxygen atom of PT-DNA is shown at the  $1.0 \sigma$  contour level (cyan). The ScoMcrA–SBD and PT-DNA structure models are superimposed onto the electron density map. In the structure models, sulfur, carbon, oxygen, and nitrogen atoms are colored in green, yellow, red, and blue, respectively. Water molecules are denoted as red crosses. The  $F_o - F_c$  difference electron density map is also shown at the  $2.5 \sigma$  contour level, with green and red representing positive and negative difference densities, respectively.



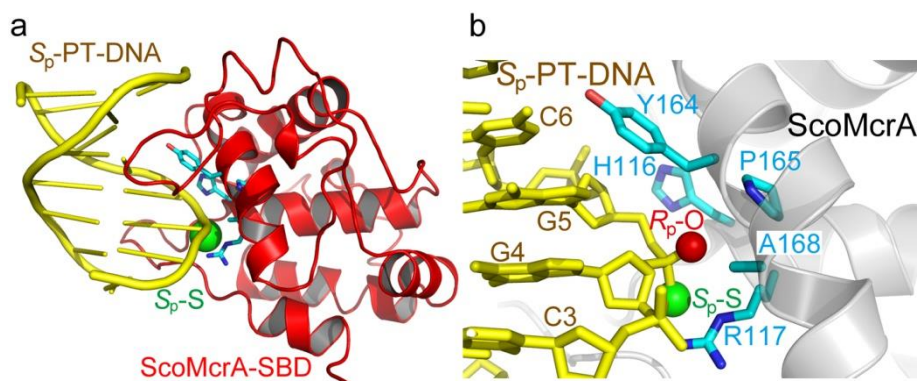

**Supplementary Figure 8.**

**In PT-DNA with the sulfur atom in the  $S_p$  configuration, the  $S_p$  sulfur atom would be in an unsuitable position that awkwardly interacts with ScoMcrA.**

(a) ScoMcrA–SBD with  $S_p$  PT-DNA docked. The sulfur atom in the  $S_p$  configuration does not fit into the sulfur-binding cavity of ScoMcrA–SBD. (b) Close-up view of the putative interface between ScoMcrA–SBD and  $S_p$  PT-DNA. The hydrophilic oxygen atom, rather than the relatively hydrophobic sulfur atom, in the  $R_p$  configuration is located in the non-polar surface cavity of ScoMcrA–SBD lined with the pyrrolidine ring of P165, the  $\beta$ -methylene groups of Y164 and H116, the  $\beta$ -methyl group of A168, which is unfavorable for the interaction.

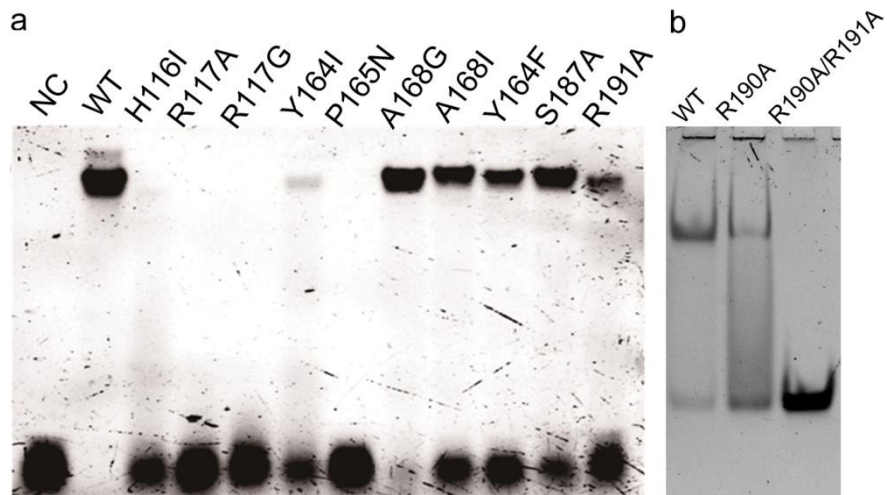

**Supplementary Figure 9.**

**Mutations of key sulfur-recognizing residues or base-contacting residues disrupted or decreased the association between ScoMcrA–SBD and PT-DNA as analyzed by the EMSA assay. (a)** Point mutants of H116I, R117A, R117G, Y164I, P165N, A168G, A168I, Y164F, S187A, and R191A were analyzed by the EMSA assay along with the wild-type ScoMcrA–SBD protein. NC, control without any protein added. **(b)** Single point mutant R190A and double point mutant R190A/R191A were analyzed by the EMSA assay along with the wild-type ScoMcrA–SBD protein.

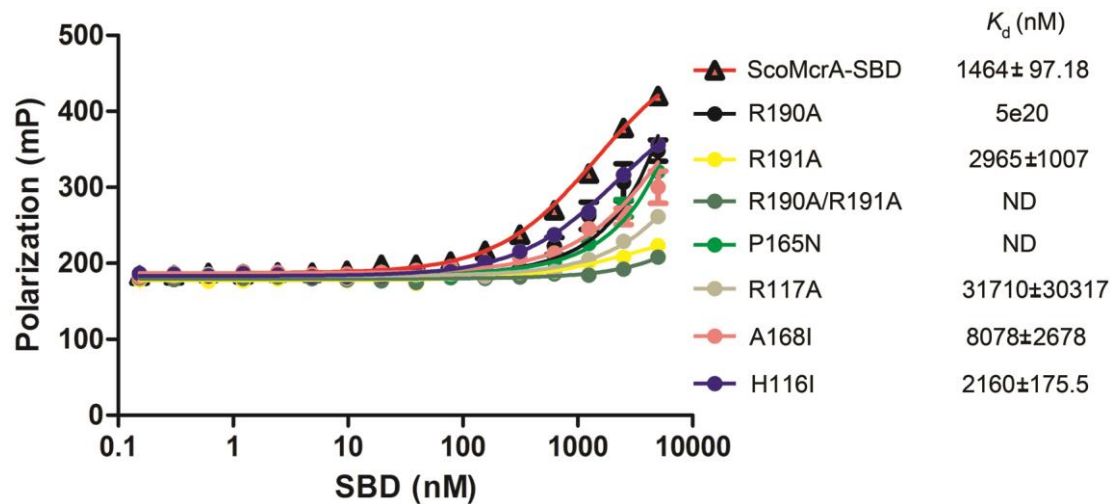

Supplementary Figure 10.

Fluorescence polarization assay showed that mutations of key sulfur-recognizing residues or base-contacting residues disrupted or decreased the association between ScoMcrA-SBD and PT-DNA. ND, the  $K_d$  value was too large to be determined because the measured polarization values were out of range. The error values were the standard error of the mean, and were calculated from two to four parallel experiments.



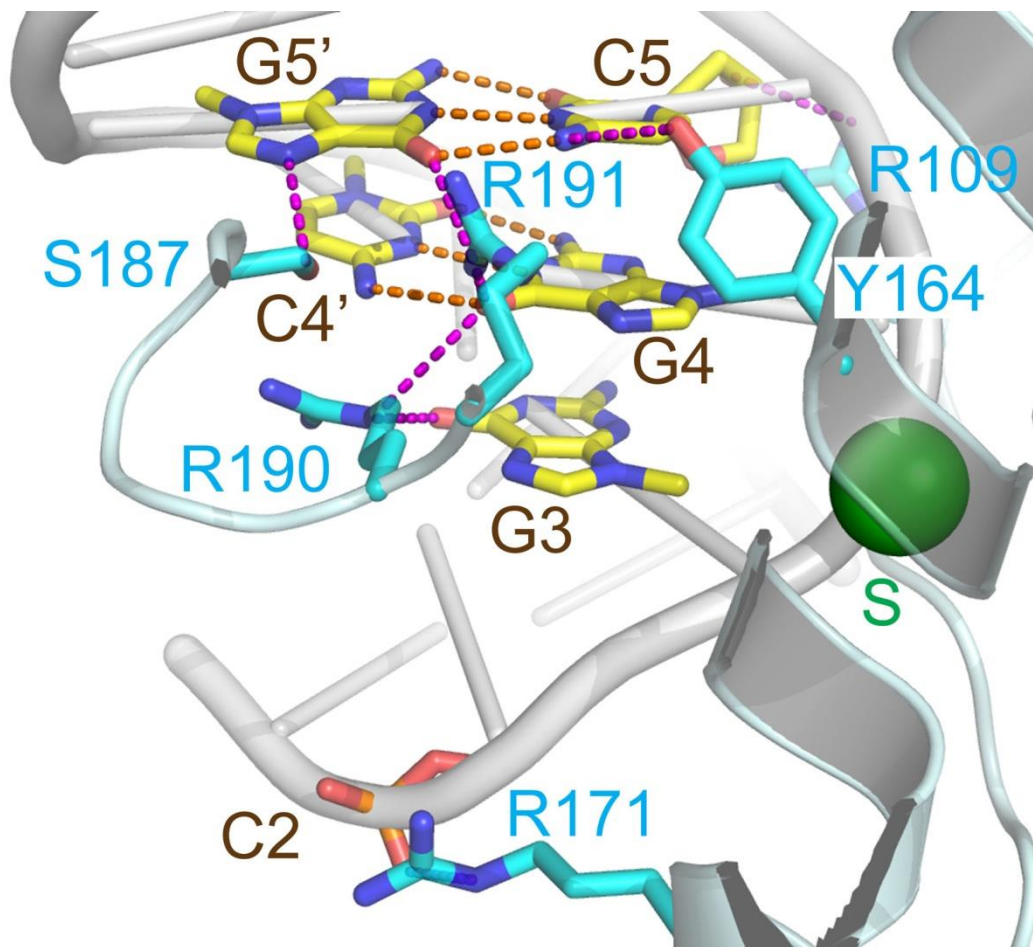

**Supplementary Figure 11.**

**The “S<sup>187</sup>RGRR<sup>191</sup> loop” of ScoMcrA inserts into the major groove of PT-DNA and provides base-specific interactions with the G<sub>ps</sub>GCC core sequence.**

The hydrogen bonds between ScoMcrA and PT-DNA are represented by magenta dashed lines, and those between base pairs of PT-DNA are shown as orange dashed lines.

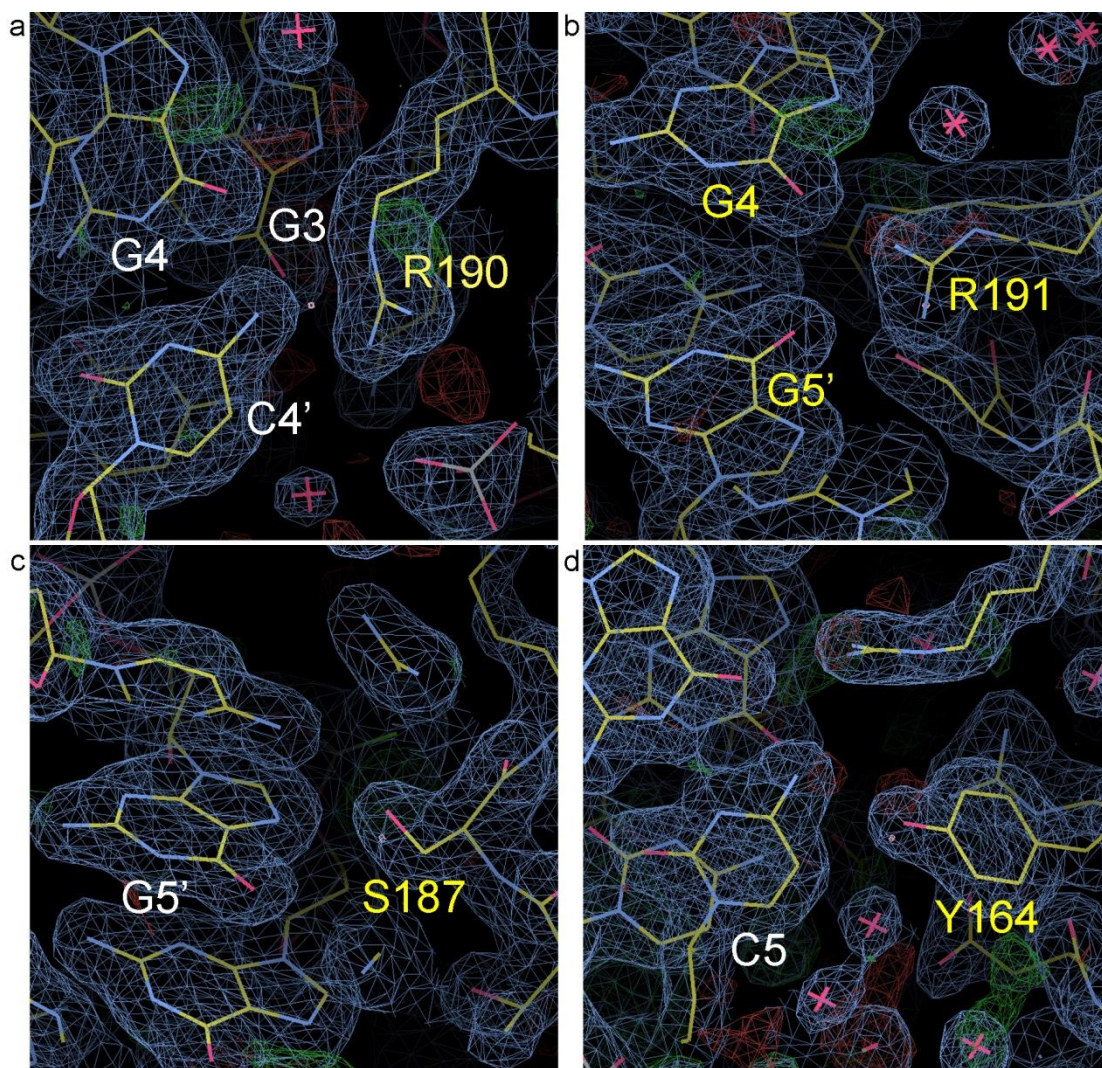

**Supplementary Figure 12.**

**Portions of the electron density map of ScoMcrA–SBD in complex with PT-DNA around the “S<sup>187</sup>RGRR<sup>191</sup> loop” of ScoMcrA–SBD.** The  $2F_o - F_c$  electron density maps around ScoMcrA-R190 (a), R191 (b), S187 (c), and Y164 (d) are shown at the  $1.0 \sigma$  contour level (cyan). The ScoMcrA–SBD and PT-DNA structure models are superimposed onto the electron density map. In the structure models, carbon, oxygen, and nitrogen atoms are colored in yellow, red, and blue, respectively. Water molecules are denoted as red crosses. The  $F_o - F_c$  difference electron density map is also shown at the  $2.5 \sigma$  contour level, with green and red representing positive and negative difference densities, respectively.



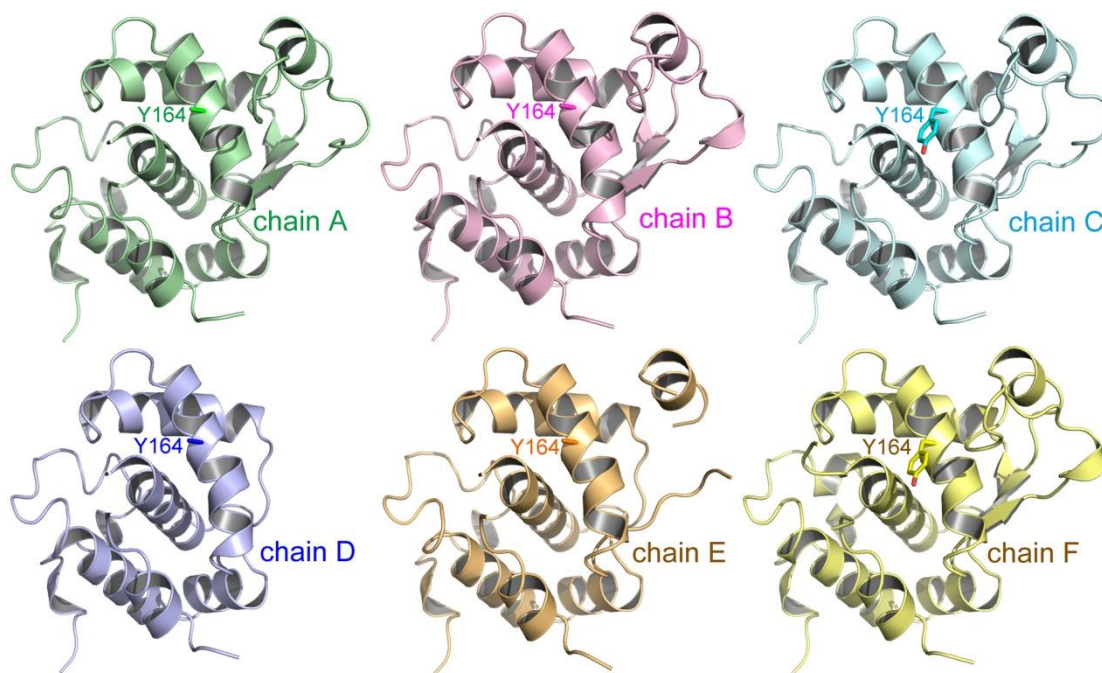

**Supplementary Figure 13.**

**Comparison of the conformations of Y164 in the six different molecules of ScoMcrA in the asymmetric unit of the crystal structure of full-length ScoMcrA by itself.** Only in chain C and chain F was the electron density of Y164 clear enough to unambiguously observe the hydroxyphenyl groups of Y164, which are both in the “closed” conformation. The hydrophobic phenyl ring of the side-chain of Y164 covers the opening of the non-polar sulfur-binding cavity. In chains A, B, D, and E, the electron densities of the side-chain of Y164 were not clear, and Y164 was modeled as alanines in these chains. This observation indicates that Y164 of ScoMcrA is flexible and samples a variety of conformations when ScoMcrA is not in complex with PT-DNA.

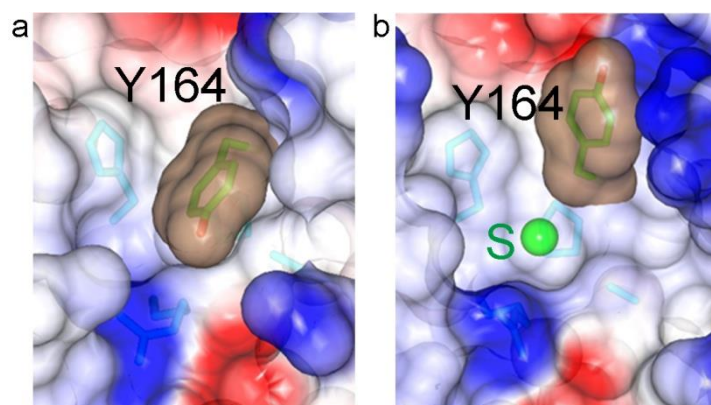

**Supplementary Figure 14.**

**Front views for the “closed” state of Y164 in the P-DNA–unbound**

**ScoMcrA-SBD and for the “open” state of Y164 in the PT-DNA–bound**

**ScoMcrA-SBD.** This suggests that when not in complex with PT-DNA, Y164 of ScoMcrA-SBD is flexible and samples a variety of conformations, including the “closed” state which the hydroxyphenyl ring of Y164 covers the opening of the sulfur-binding pocket. On the other hand, binding to PT-DNA (both to the sulfur atom and to the  $G_{PS}GCC$  core sequence) induces the flipping of hydroxyphenyl ring of Y164 and stabilizes it in the “open” state. **(a)** In the PT-DNA–unbound ScoMcrA-SBD, Y164 exists in the “closed” state, and its phenyl ring covers the sulfur-binding cavity of ScoMcrA-SBD. The electrostatic surface of ScoMcrA-SBD is shown. Y164 is displayed both in stick and space-filling representations. **(b)** In the PT-DNA–bound ScoMcrA-SBD, Y164 exists in the “open” state. The hydroxyphenyl group of its side-chain rotates away to allow the sulfur atom of PT-DNA to access the sulfur-binding cavity of ScoMcrA-SBD. The sulfur atom of PT-DNA is shown as a green sphere. The rest of PT-DNA is omitted for clarity.

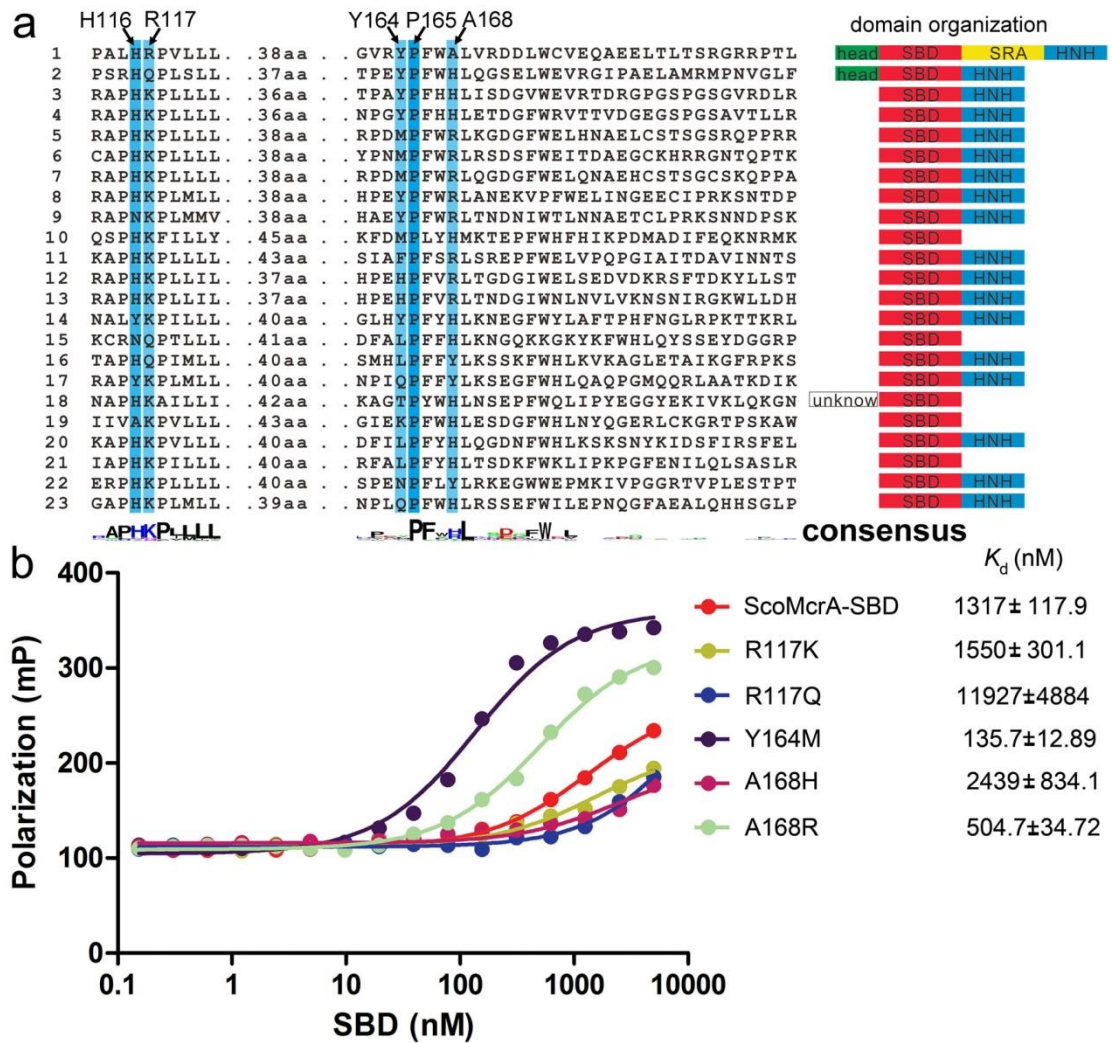

Supplementary Figure 15.

### Multiple sequence alignment of representative ScoMcrA-SBD

### homologues from various bacteria, and measurement of the dissociation constant

### of various point mutants of ScoMcrA-SBD for PT-DNA. (a) Some of the

sulfur-recognizing residues are highly conserved. The consensus sequence is shown at

the bottom. Domain organizations of these ScoMcrA homologues are shown on the

right. The protein accession numbers and the names of the organisms they derive from

are listed in **Supplementary Table 3**. (b) Mutation of R117 did not appreciably affect,

while mutations of R117Q or A168H compromised the binding between

ScoMcrA-SBD and PT-DNA. Mutations of Y164M and A168R somehow increased

the binding affinity of ScoMcrA–SBD for PT-DNA. The error values were the standard error of the mean, and were calculated from two to four parallel experiments.

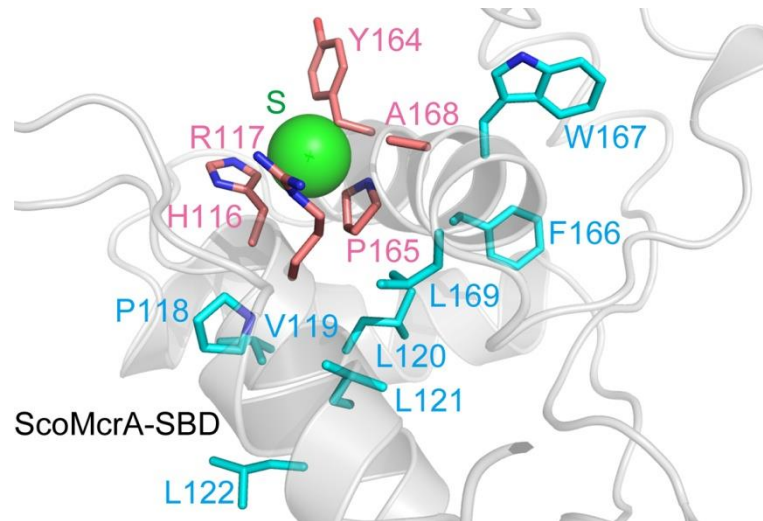

**Supplementary Figure 16.**

**Conserved residues P118, V119, L120, L121, F166, W167, L169, and W175 of ScoMcrA participate in forming the hydrophobic core of the SBD domain of ScoMcrA.**

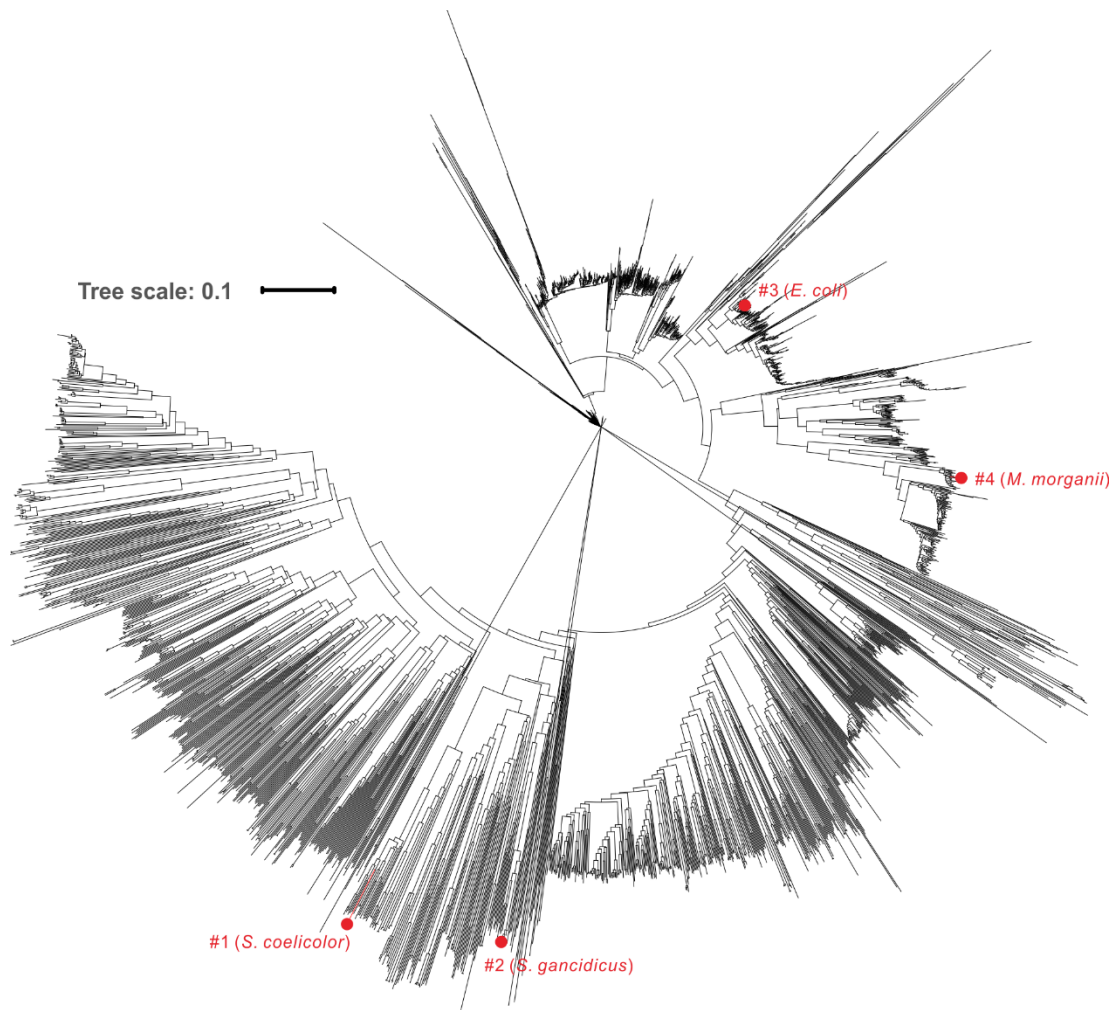

**Supplementary Figure 17.**

**Phylogenetic tree for ScoMcrA-SBD homologues.** Phylogenetic tree for 2,761 ScoMcrA-SBD homologues constructed based on amino acid sequences. Homologues from *Streptomyces coelicolor* (#1), *Streptomyces gancidicus* (#2), *Escherichia coli* (#3), and *Morganella morgani* (#4) are marked with red dots.



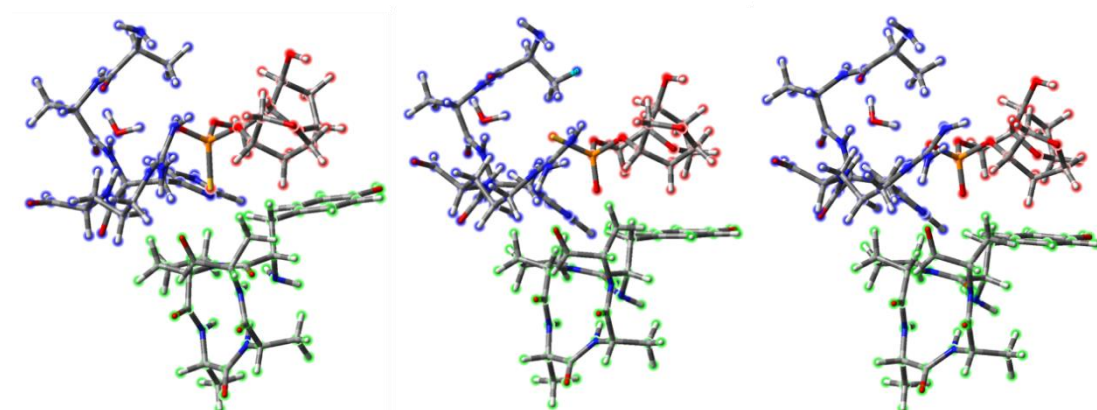

**Supplementary Figure 18.**

**The optimized  $R_p$ -,  $S_p$ -phosphorothioate and normal phosphate in complex with  $\alpha$ -helices 5 and 8 of SBD protein are shown in the left, middle, and right panels, respectively. Phosphorothioate/phosphate,  $\alpha$ -helices 5 and 8 were drawn in red, blue, and green, respectively.**

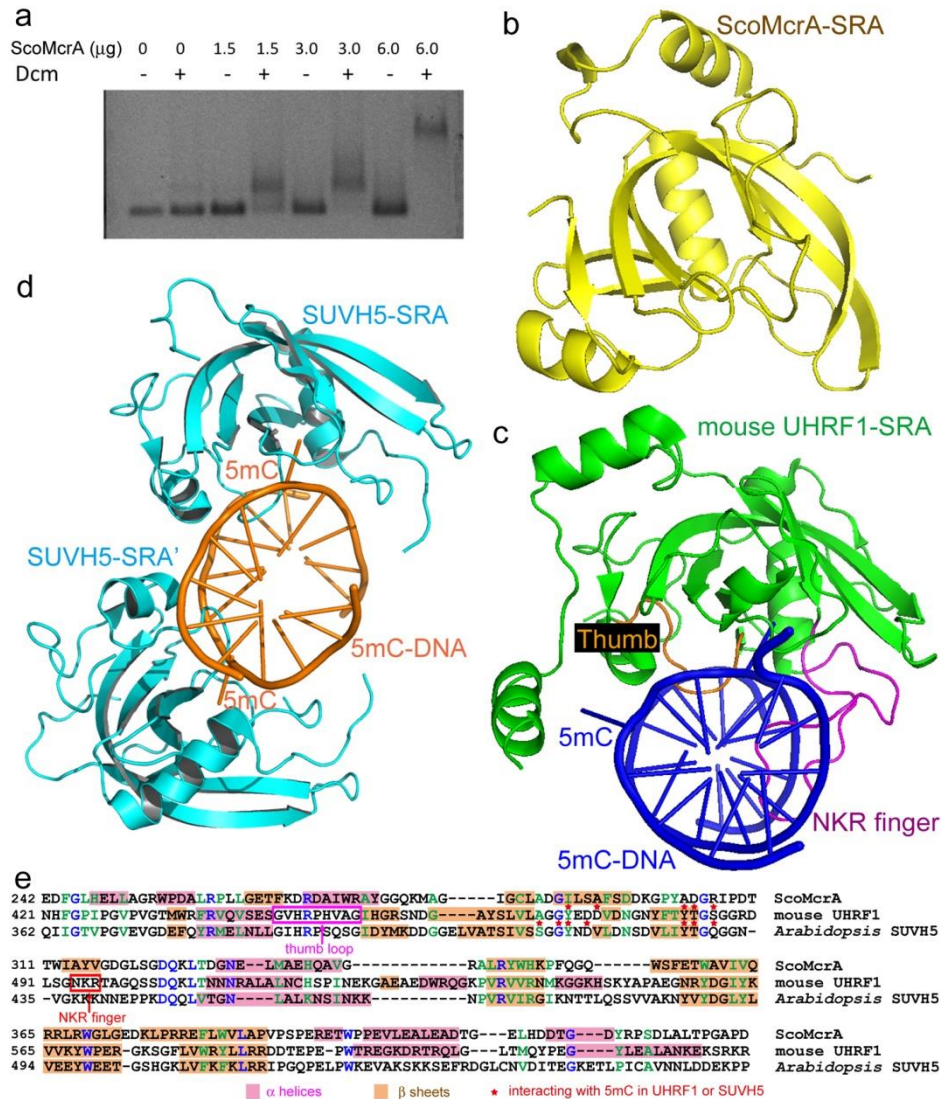

Supplementary Figure 19.

### Structural comparison of the SRA domain of ScoMcrA with that of UHRF1

and of SUVH5. (a) ScoMcrA interacts with DNA methylated by Dcm, as analyzed by the EMSA assay. (b) Structure of the SRA domain of ScoMcrA. (c) Structure of the SRA domain of mouse UHRF1 in complex with hemi-methylated DNA (PDB code: 2ZO0)<sup>19</sup>. The “NKR finger” and “thumb loop” motifs of UHRF1 that participate in binding methylated DNA are indicated. Note that the “NKR finger” and “thumb loop” features are absent in the structure of the SRA domain of ScoMcrA. (d) Structure of the SRA domain of *Arabidopsis* SUVH5 in complex with fully methylated DNA (PDB code: 3Q0B)<sup>21</sup>. (e) Structure-based sequence alignment of the

SRA domains of ScoMcrA, mouse UHRF1, and *Arabidopsis* SUVH5.  $\alpha$  helices and  $\beta$  sheets are shaded in pink and salmon, respectively. Identical or similar residues among ScoMcrA, UHRF1, and SUVH5 are colored in blue or green, respectively. The 5-methyl cytosine (5mC)-interacting residues of UHRF1 and SUVH5 are marked by red stars. The “NKR finger” and “thumb loop” motifs of UHRF1 are indicated by red and magenta squares, respectively.

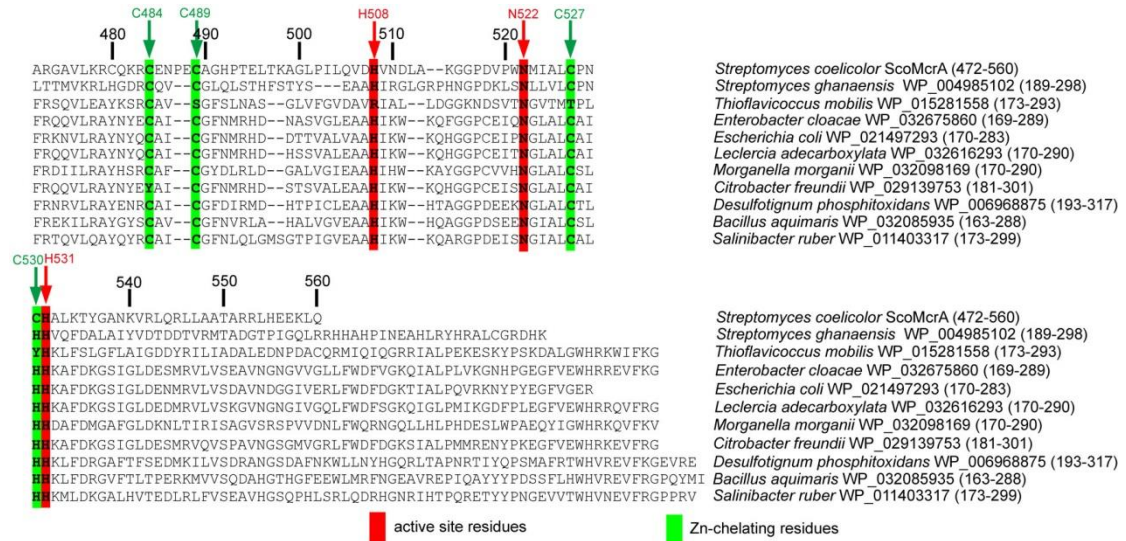

## Supplementary Figure 20.

### Multiple sequence alignment of the HNH domains of ScoMcrA

homologues from various bacteria. Residues corresponding to the active site residues H508, N522, and H531 important for the endonuclease activity of ScoMcrA are highlighted in red, while those corresponding to the four zinc-chelating residues C484, C489, C527, and C530 are highlighted in green.

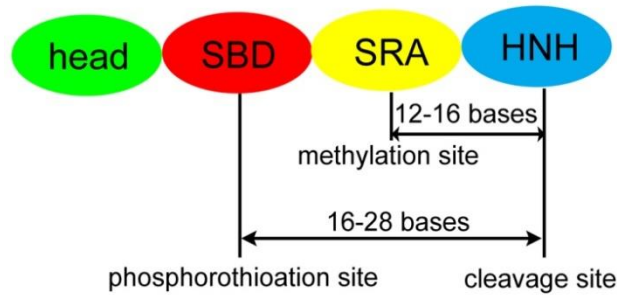

**Supplementary Figure 21.**

**A schematic model explaining that ScoMcrA cleaves DNA farther from the phosphorothioation site than from the methylation site.** The spatial positions of the SBD, SRA, and HNH domains of ScoMcrA are linearly organized. The physical distance between the SBD and the HNH domains is larger than that between the SRA and HNH domain. Since the SBD, SRA, and HNH domains are responsible for recognizing PT-DNA, associating with methylated DNA, and performing double strand cleavage on DNA, respectively, this provides an explanation that the distance between the phosphorothioation and ScoMcrA cleavage sites on PT-DNA is larger than that between the methylation and ScoMcrA cleavage sites on methylated DNA<sup>14</sup>.

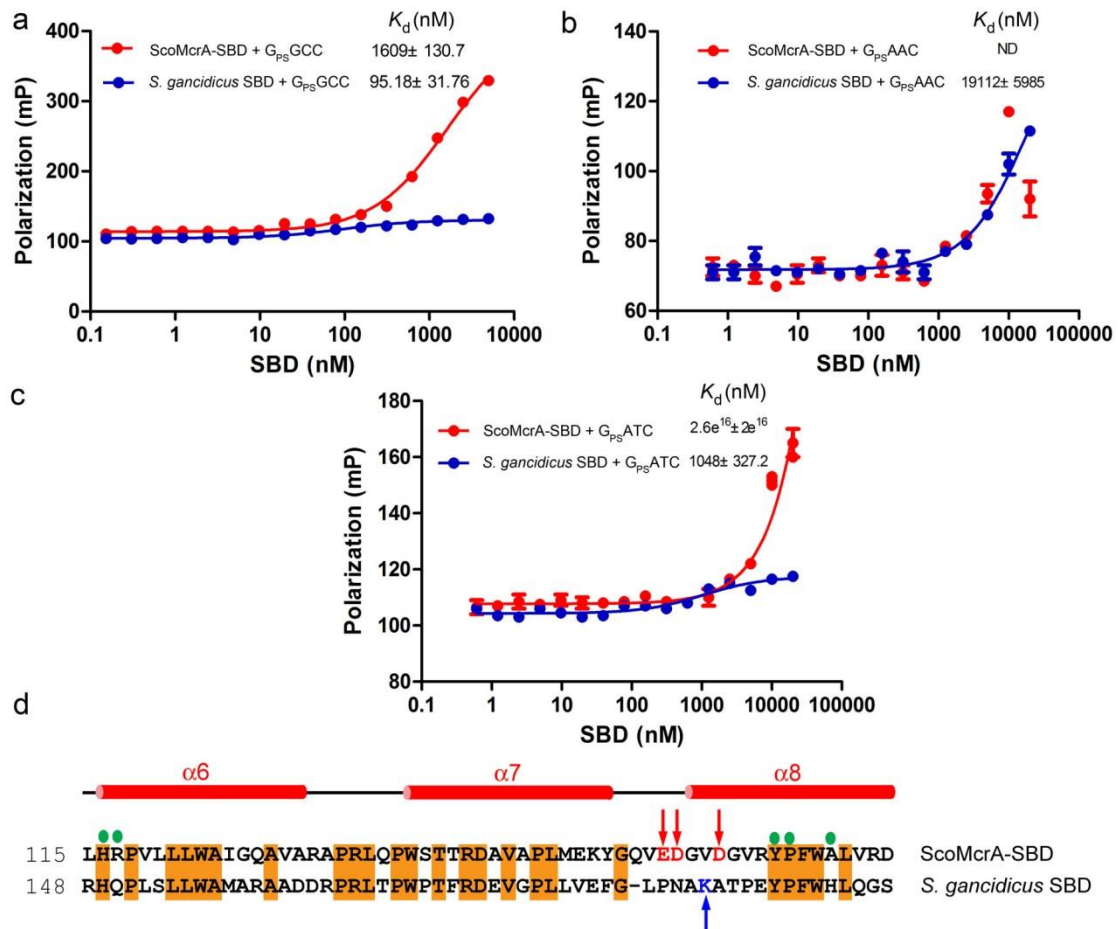

Supplementary Figure 22.

*Streptomyces gancidicus* SBD homologue associated with PT-DNA harboring core sequence of  $G_{PS}GCC$ ,  $G_{PS}AAC$ , or  $G_{PS}ATC$ ; whereas ScoMcrA-SBD only interacted with  $G_{PS}GCC$  PT-DNA. (a) Both the *S. gancidicus* SBD homologue and ScoMcrA-SBD associated with PT-DNA harboring core sequence of  $G_{PS}GCC$ . The error values were the standard error of the mean, and were calculated from two to four parallel experiments. (b) The *S. gancidicus* SBD homologue associated with PT-DNA harboring core sequence of  $G_{PS}AAC$ , but ScoMcrA-SBD did not. (c) The *S. gancidicus* SBD homologue associated with PT-DNA harboring core sequence of  $G_{PS}ATC$ , but there was almost no interaction between ScoMcrA-SBD and  $G_{PS}ATC$  PT-DNA. (d) Negatively charged residues E156, D157, and D160, present in ScoMcrA-SBD but absent in the *S. gancidicus*

SBD homologue may decrease the interaction between ScoMcrA–SBD and PT-DNA so that ScoMcrA–SBD is unable to associate with G<sub>PS</sub>AAC and G<sub>PS</sub>ATC; whereas positively charged residue K191 present in the *S. gancidicus* SBD homologue but absent in ScoMcrA–SBD may increase the interaction between the *S. gancidicus* SBD homologue and PT-DNA. Sequence comparison between ScoMcrA–SBD and the *S. gancidicus* SBD homologue is shown. The three negatively charged residues E156, D157, and D160, present in ScoMcrA–SBD but absent in the *S. gancidicus* SBD homologue, are shown in red and marked by red arrows. The positively charged residue K191, present in the *S. gancidicus* SBD homologue but absent in ScoMcrA–SBD, is shown in blue and marked by a blue arrow. The sulfur-binding residues H116, R117, Y164, P165, and A168 in ScoMcrA–SBD are indicated with green ovals. Conserved residues are shaded in orange. Secondary structures and starting residue numbers are indicated above and on the left of the protein sequences, respectively. The “SRGRR loop” of ScoMcrA–SBD exists between  $\alpha$  helices  $\alpha$ 9 and  $\alpha$ 10, and is not shown in the figure.



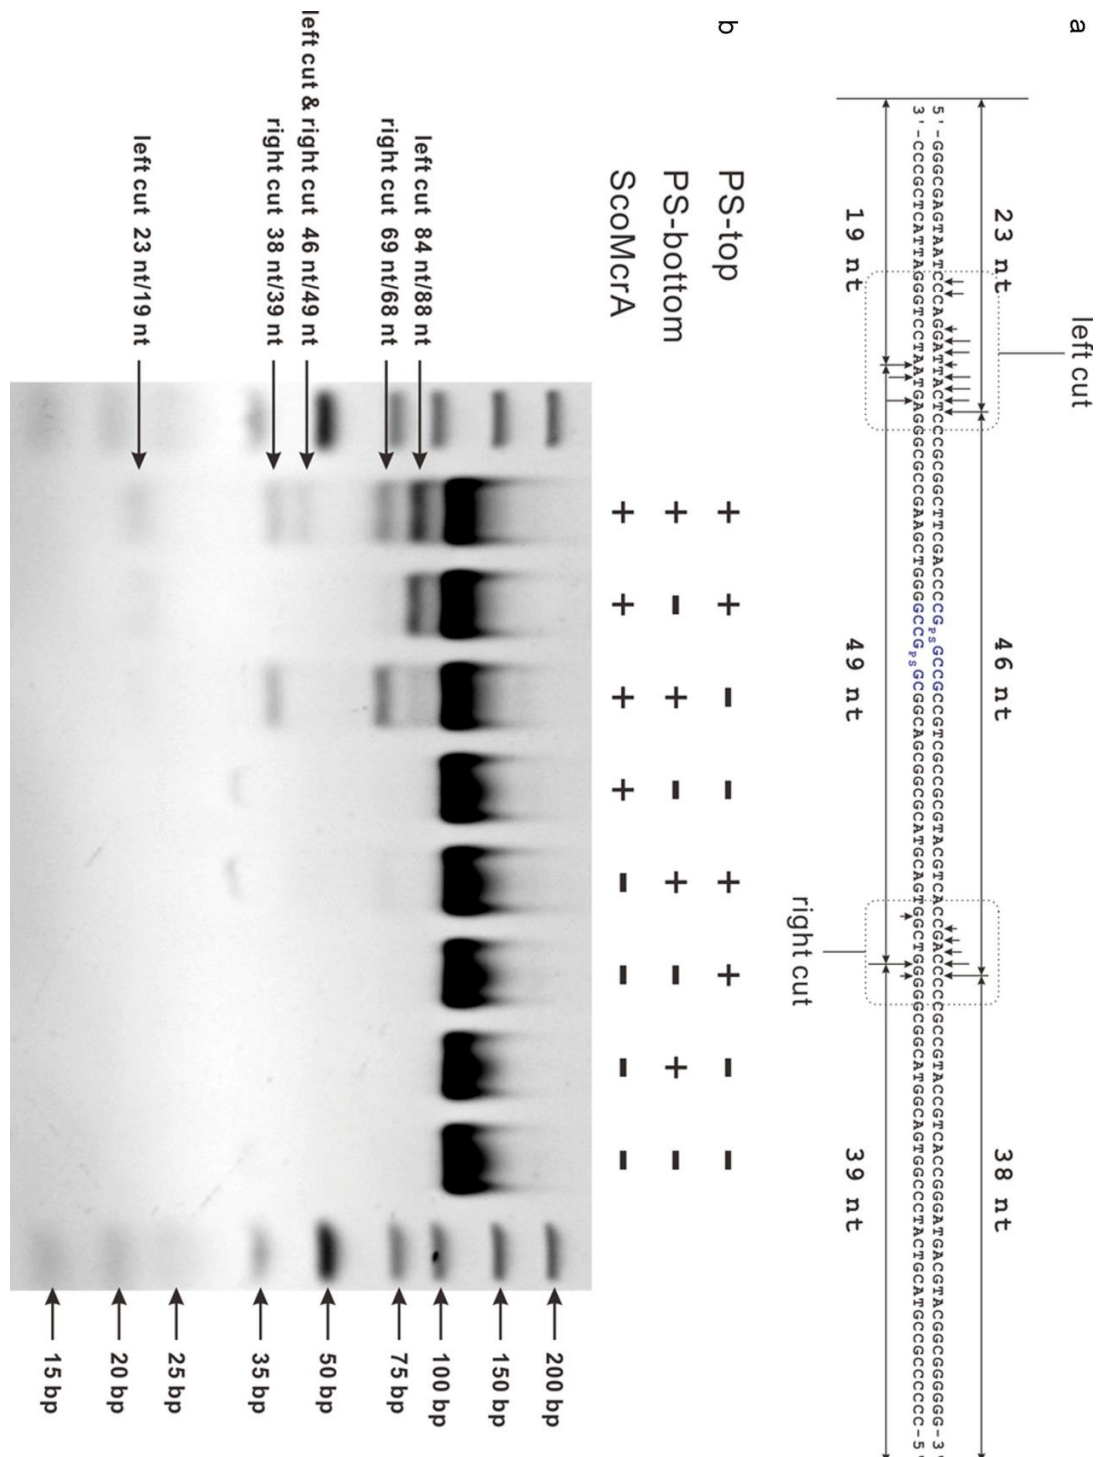

Supplementary Figure 23.

With its SBD domain recognizing the core sequence of PT-DNA, ScoMcra employs its HNH domain to perform the cleavage ~23 bp away from the phosphorothioation site. (a) Sequence of the PT-DNA (with both top and bottom strands phosphorothioated) used in our *in vitro* ScoMcra cleavage assay. (b) *In vitro* ScoMcra cleavage assay of PT-DNA.



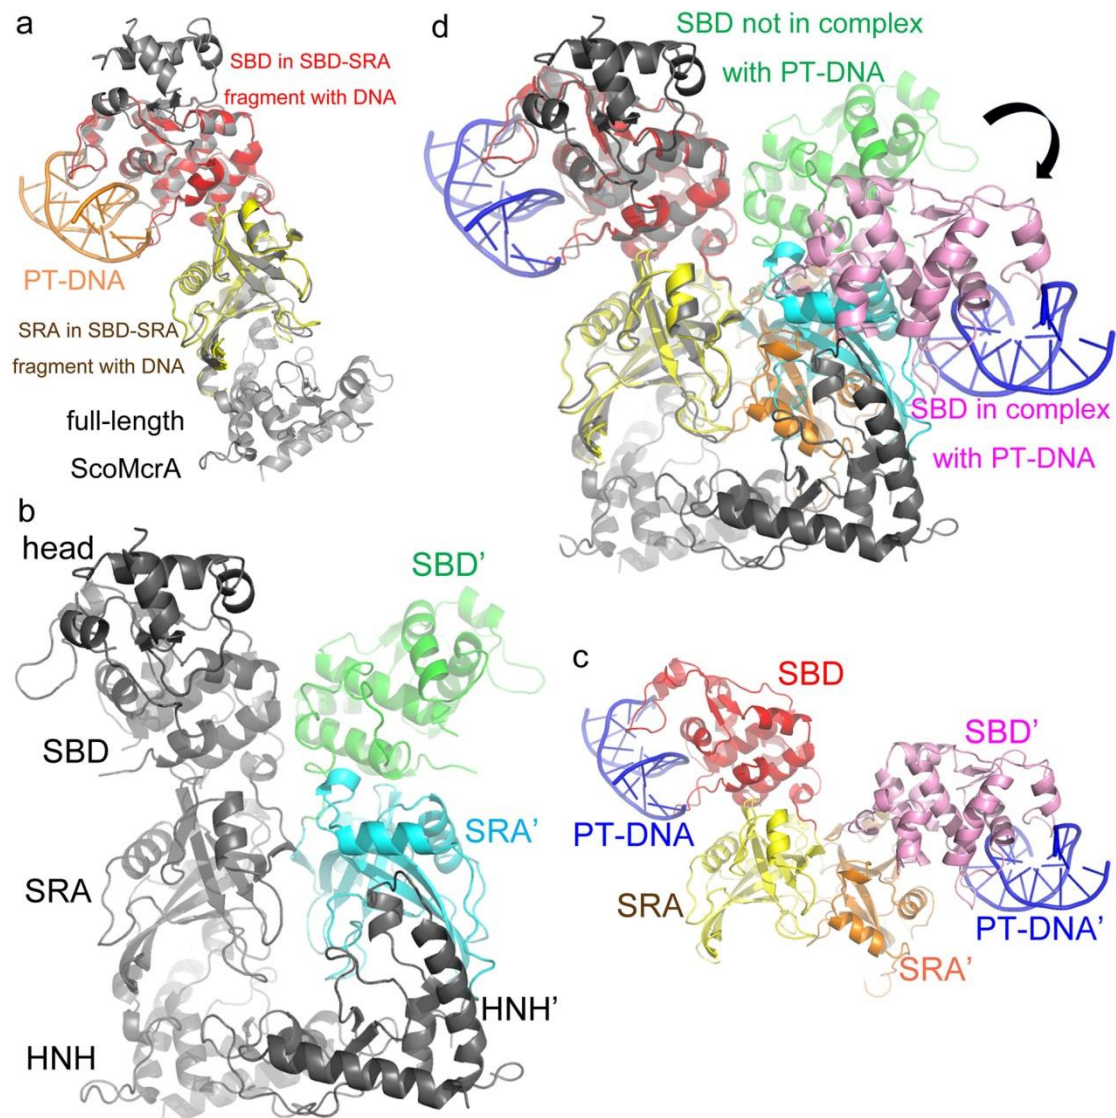

**Supplementary Figure 24.**

**Comparison of full-length ScoMcrA with the SBD-SRA fragment in complex**

**with PT-DNA.** (a) Comparison of a protomer of full-length ScoMcrA with a protomer of the SBD-SRA fragment in complex with PT-DNA. The SBD and SRA domains in the SBD-SRA fragment are colored in red and yellow, respectively. PT-DNA is colored in orange. Full-length ScoMcrA is colored in grey. (b) Structure of the full-length ScoMcrA dimer. The spatial position of one of the protomers is the same as in a. The SBD and SRA domains of the other protomer (labeled as SBD' and SRA') are colored in green and cyan, respectively. (c) Structure of the SBD-SRA fragment in complex with PT-DNA. The spatial position of one of the protomers is the

same as in **a**. **(d)** Superimposition of the full-length ScoMcrA dimer with the SBD-SRA fragment dimer in complex with PT-DNA. Color coding is the same as in **b** and **c**. The ScoMcrA dimer has to undergo a conformational change to adjust its dimeric assembly upon interaction with PT-DNA.

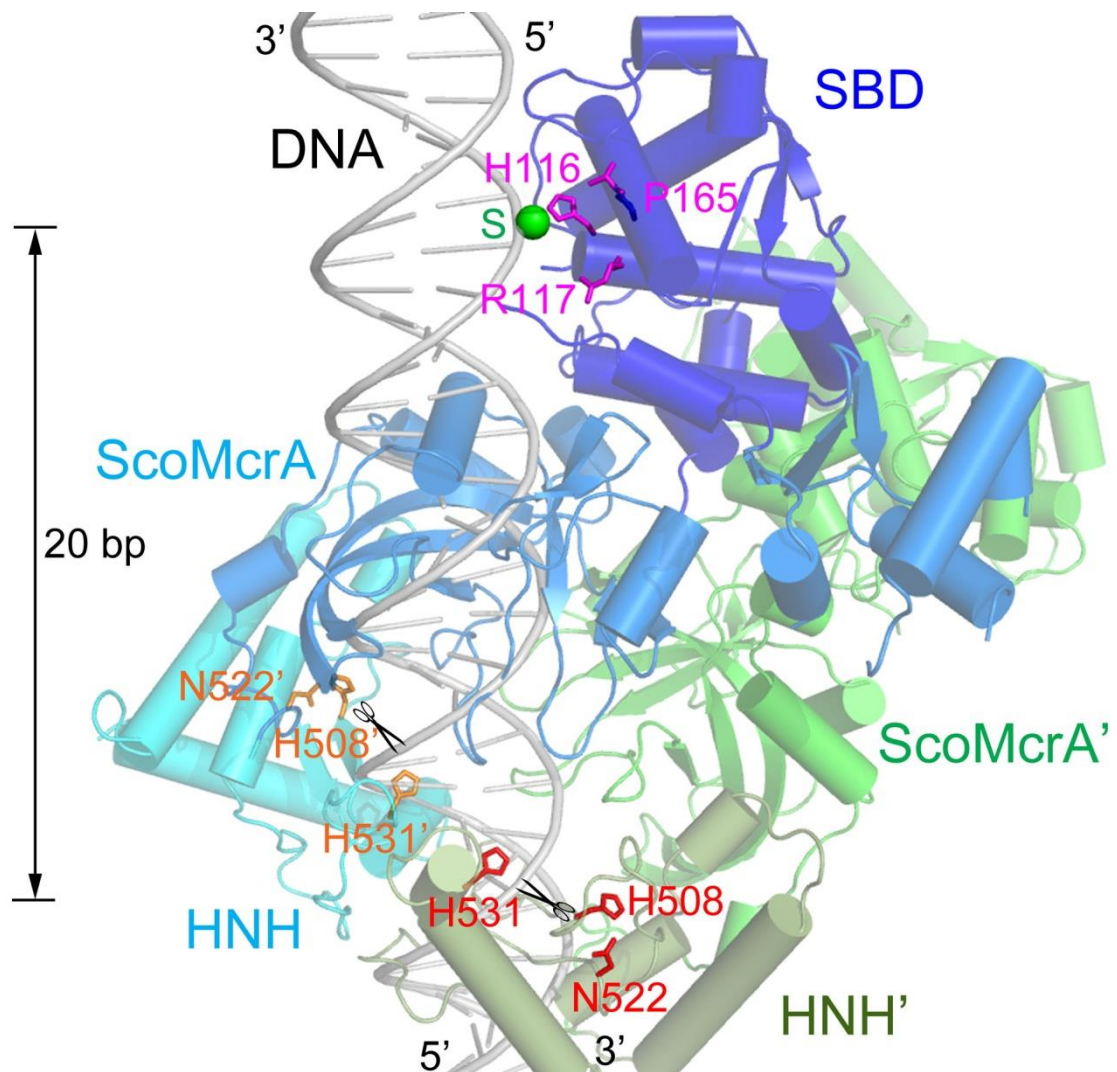

**Supplementary Figure 25.**

**A model of full-length ScoMcrA dimer in complex with PT-DNA.** One ScoMcrA protomer is colored in cyan, with its SBD domain colored in blue. The other ScoMcrA protomer (labeled as ScoMcrA') is colored in green, with its HNH domain (labeled as HNH') colored in smudge. The H116, R117, and P165 residues of the SBD domain responsible for recognizing the sulfur atom of PT-DNA are shown as magenta sticks. The H508, N522, and H531 residues from the active sites of the HNH and HNH' domains are shown as orange and red sticks, respectively. The distance between the SBD-recognition site and the HNH'-contact site on PT-DNA is about 20 base pairs. The HNH and HNH' domains from the two ScoMcrA protomers are responsible for

cleaving the two strands of PT-DNA. The cleavage sites on the two strands of PT-DNA are mimicked according to the most frequently cut sites by the cleavage statistics on the left side of the PT site (see **Supplementary Fig. 23**).

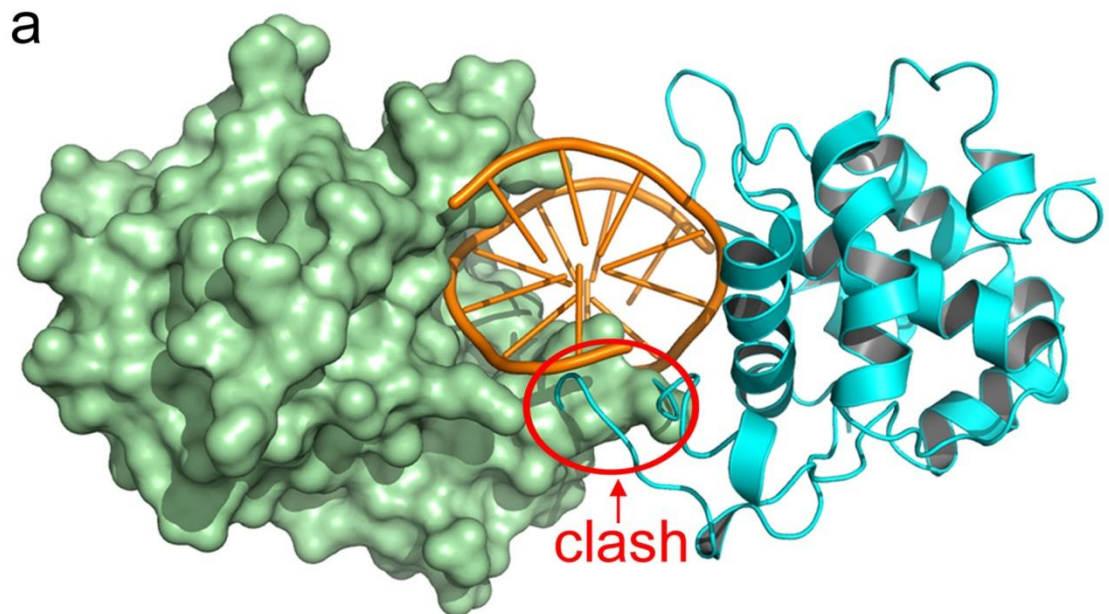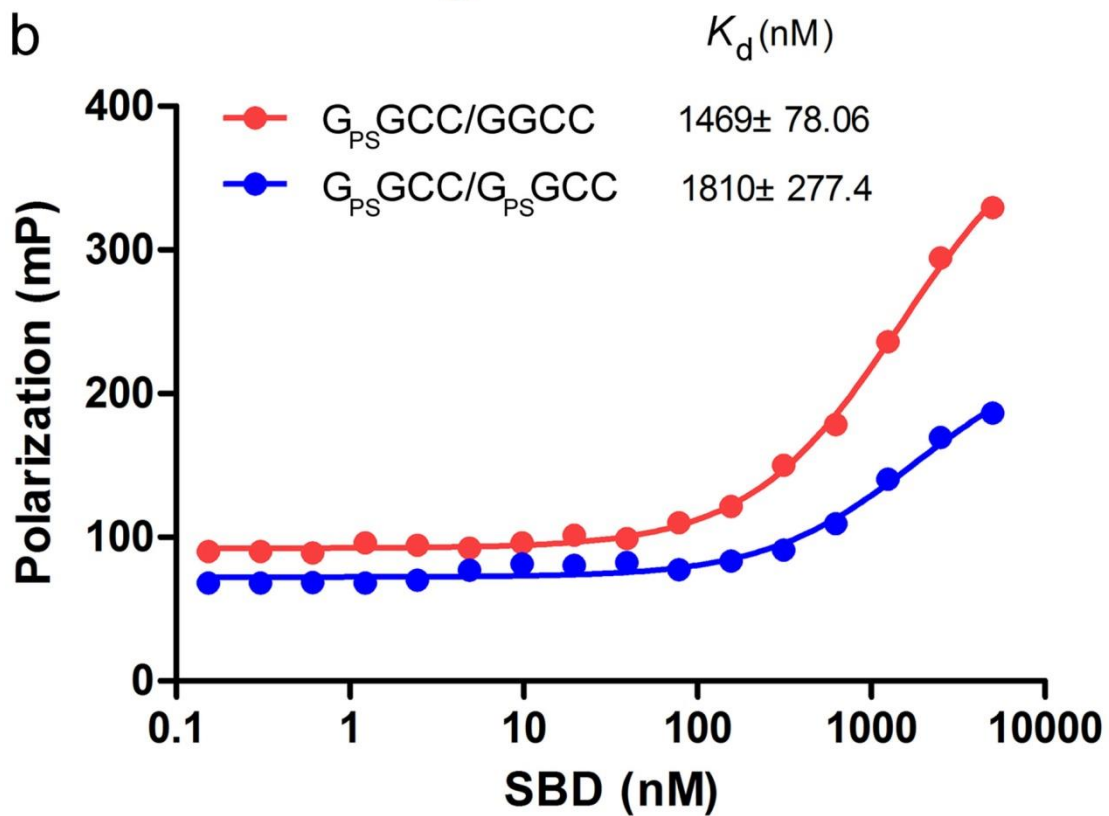

Supplementary Figure 26.

The SRGRR loops from two ScoMcrA–SBD domains cannot bind to the two strands of the same PT-DNA at the same time. (a) The SRGRR loops from two ScoMcrA–SBD domains would clash with each other if they are modeled onto the two strands of the same PT-DNA. (b) The dissociation constant ( $K_d$ ) value of ScoMcrA–SBD associating with hemi-phosphorothioated DNA and that of

ScoMcrA–SBD associating with DNA phosphorothioated on both strands are similar.

The error values were the standard error of the mean, and were calculated from two to four parallel experiments.

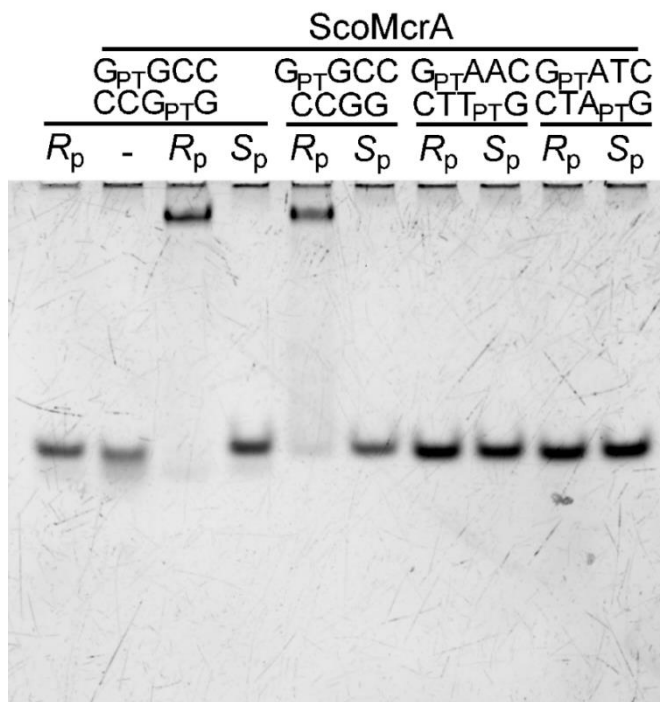

**Supplementary Figure 27.**

**Uncropped image for Figure 1a in the main article.**



*S. coelicolor* (#1)      *S. gancidicus* (#2)

| $\frac{G_{PT}GCC}{CCG_{PT}G}$ |       | $\frac{G_{PT}GCC}{CCG_{PT}G}$ |       | $\frac{G_{PT}AAC}{CTT_{PT}G}$ |       | $\frac{G_{PT}ATC}{CTA_{PT}G}$ |       |       |
|-------------------------------|-------|-------------------------------|-------|-------------------------------|-------|-------------------------------|-------|-------|
| $R_p$                         | $S_p$ | -                             | $R_p$ | $S_p$                         | $R_p$ | $S_p$                         | $R_p$ | $S_p$ |

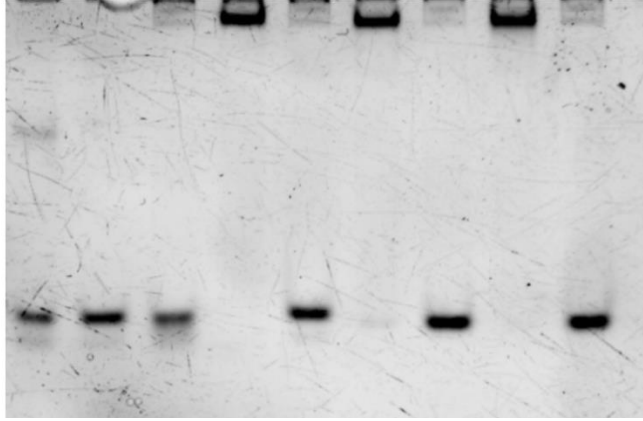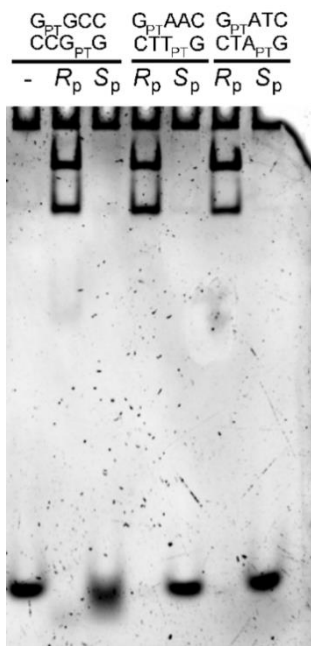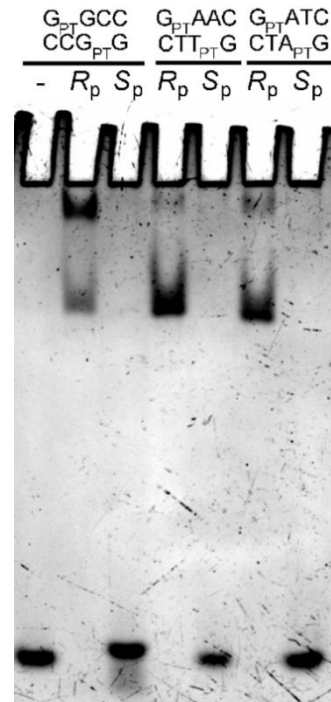

Supplementary Figure 28.

Uncropped images for Figure 6c in the main article.

**Supplementary Table 1. Data collection and refinement statistics.**



| <b>Data collection</b>                                             | SeMet-ScoMcrA                                         | Full-length ScoMcrA<br>by itself                      | The ScoMcrA–SBD-SRA<br>/PT-DNA complex | The ScoMcrA–SBD/PT-DNA<br>complex |
|--------------------------------------------------------------------|-------------------------------------------------------|-------------------------------------------------------|----------------------------------------|-----------------------------------|
| Beamline                                                           | BL17U1                                                | BL17U1                                                | BL17U1                                 | BL19U1                            |
| Space group                                                        | <i>P</i> 2 <sub>1</sub> 2 <sub>1</sub> 2 <sub>1</sub> | <i>P</i> 2 <sub>1</sub> 2 <sub>1</sub> 2 <sub>1</sub> | <i>I</i> 4 <sub>1</sub> 22             | <i>C</i> 2 <sub>1</sub>           |
| Wavelength (Å)                                                     | 0.97931                                               | 0.97892                                               | 0.97916                                | 0.97853                           |
| Unit cell parameters                                               |                                                       |                                                       |                                        |                                   |
| <i>a</i> , <i>b</i> , <i>c</i> (Å)                                 | 130.2, 139.4, 281.0                                   | 130.2, 139.4, 281.0                                   | 122.3, 122.3, 313.7                    | 88.0, 57.2, 42.3                  |
| $\alpha$ , $\beta$ , $\gamma$ (°)                                  | 90, 90, 90                                            | 90, 90, 90                                            | 90, 90, 90                             | 90, 101.4, 90                     |
| molecules/asymmetric unit                                          | 6                                                     | 6                                                     | 1                                      | 1                                 |
| Resolution range (Å)                                               | 50.0-3.20 (3.31-3.20)                                 | 50-3.15 (3.26-3.15)                                   | 50-3.30 (3.42-3.30)                    | 50-1.70 (1.76-1.70)               |
| Completeness (%)                                                   | 99.9 (100.0)                                          | 99.9 (99.9)                                           | 99.9 (100.0)                           | 97.0 (96.1)                       |
| Redundancy                                                         | 7.3 (7.4)                                             | 5.7 (5.7)                                             | 3.8 (3.9)                              | 3.8 (3.8)                         |
| Total observations                                                 | 608,722                                               | 503,893                                               | 132,810                                | 85,089                            |
| Unique reflections                                                 | 83,384                                                | 88,897                                                | 34,877                                 | 22,244                            |
| R <sub>merge</sub> (%)                                             | 12.8 (74.0)                                           | 14.7 (95.8)                                           | 8.5 (63.2)                             | 8.4 (18.8)                        |
| I/ $\sigma$ <sub>I</sub>                                           | 16.8 (3.1)                                            | 12.8 (2.1)                                            | 14.1 (2.0)                             | 11.4 (8.4)                        |
| <b>Refinement</b>                                                  |                                                       |                                                       |                                        |                                   |
| Resolution range (Å)                                               |                                                       | 50-3.15                                               | 50-3.30                                | 50-1.70                           |
| R <sub>work</sub> /R <sub>free</sub> factors (%)                   |                                                       | 25.4/28.0                                             | 23.7/26.3                              | 20.0/21.7                         |
| Overall B factor                                                   |                                                       | 76.9                                                  | 101.6                                  | 26.2                              |
| RMSD bond lengths (Å)                                              |                                                       | 0.011                                                 | 0.009                                  | 0.006                             |
| RMSD bond angles (°)                                               |                                                       | 1.480                                                 | 1.412                                  | 1.533                             |
| Final model (protein/DNA/solvent atoms)                            |                                                       | 23,273/0/79                                           | 2,527/404/23                           | 1,260/328/172                     |
| Ramachandran plot (preferred, generally<br>allowed, disallowed, %) |                                                       | 94.7, 5.0, 0.2                                        | 92.2, 6.6, 1.2                         | 98.0, 2.0, 0                      |
| PDB code                                                           |                                                       | 5ZMM                                                  | 5ZMN                                   | 5ZMO                              |

$R_{\text{merge}} = \frac{\sum_h \sum_i |I_{h,i} - I_h|}{\sum_h \sum_i I_{h,i}}$  for the intensity ( $I$ ) of observation  $i$  of reflection  $h$ . R factor =  $\frac{\sum ||F_{\text{obs}}| - |F_{\text{calc}}||}{\sum |F_{\text{obs}}|}$ , where  $F_{\text{obs}}$  and  $F_{\text{calc}}$  are the observed and calculated structure factors, respectively.  $R_{\text{free}}$  = R factor calculated using 5% of the reflection data chosen randomly and omitted from the start of refinement. RMSD, root-mean-square deviation from ideal geometry. Data for the highest resolution shell are shown in parentheses.

**Supplementary Table 2. ScoMcrA–SBD homologues are widely present in prokaryotes.**

| Phylum         | Class               | Order             | Family                 | Representative organism                | Representative protein |
|----------------|---------------------|-------------------|------------------------|----------------------------------------|------------------------|
| Proteobacteria | Alphaproteobacteria | Rhodobacterales   | Rhodobacteraceae       | <i>Oceanicola</i> sp. HL-35            | WP_051469220           |
| Proteobacteria | Betaproteobacteria  | Burkholderiales   | Alcaligenaceae         | <i>Achromobacter</i> sp. ATCC13047     | CUJ22279               |
| Proteobacteria | Betaproteobacteria  | Burkholderiales   | Burkholderiaceae       | <i>Burkholderia catudaia</i>           | SAK40244               |
| Proteobacteria | Betaproteobacteria  | Burkholderiales   | Comamonadaceae         | <i>Variovorax</i> sp. WDL1             | KWT70824               |
| Proteobacteria | Betaproteobacteria  | Neisseriales      | Neisseriaceae          | <i>Kingella kingae</i>                 | WP_038329911           |
| Proteobacteria | Betaproteobacteria  | Rhodocyclales     | Rhodocyclaceae         | <i>Thauera linaloolentis</i> 47Lol     | ENO88419               |
| Proteobacteria | Betaproteobacteria  | unclassified      | Accumulibacter         | <i>Accumulibacter</i> sp. SK-11        | EXI66531               |
| Proteobacteria | Gammaproteobacteria | Alteromonadales   | Alteromonadaceae       | <i>Alteromonas mediterranea</i>        | WP_071958283           |
| Proteobacteria | Gammaproteobacteria | Alteromonadales   | Colwelliaceae          | <i>Colwellia</i> sp. TT2012            | WP_057831072           |
| Proteobacteria | Gammaproteobacteria | Alteromonadales   | Idiomarinaceae         | <i>Idiomarina woesei</i>               | WP_055439006           |
| Proteobacteria | Gammaproteobacteria | Alteromonadales   | Pseudoalteromonadaceae | <i>Pseudoalteromonas luteoviolacea</i> | WP_063360449           |
| Proteobacteria | Gammaproteobacteria | Alteromonadales   | Psychromonadaceae      | <i>Psychromonas aquimarina</i>         | WP_028862783           |
| Proteobacteria | Gammaproteobacteria | Alteromonadales   | Shewanellaceae         | <i>Shewanella violacea</i>             | WP_013051377           |
| Proteobacteria | Gammaproteobacteria | Chromatiales      | Chromatiaceae          | <i>Thioflavicoccus mobilis</i>         | WP_041603764           |
| Proteobacteria | Gammaproteobacteria | Chromatiales      | Ectothiorhodospiraceae | <i>Thioalkalivibrio</i> sp. HK1        | WP_025770107           |
| Proteobacteria | Gammaproteobacteria | Cellvibrionales   | Haliaceae              | <i>Congregibacter litoralis</i>        | WP_023660089           |
| Proteobacteria | Gammaproteobacteria | Enterobacteriales | Enterobacteriaceae     | <i>Escherichia coli</i>                | WP_000199891           |
| Proteobacteria | Gammaproteobacteria | Methylococcales   | Methylococcaceae       | <i>Methylomicrobium buryatense</i>     | WP_017840088           |
| Proteobacteria | Gammaproteobacteria | Methylococcales   | Methylothermaceae      | <i>Methylohalobius crimeensis</i>      | WP_022949730           |
| Proteobacteria | Gammaproteobacteria | Oceanospirillales | Alcanivoracaceae       | <i>Alcanivorax</i> sp. NBRC 102024     | WP_062817540           |
| Proteobacteria | Gammaproteobacteria | Oceanospirillales | Hahellaceae            | <i>Endozoicomonas atrinae</i>          | WP_066017028           |

|                |                     |                     |                     |                                                  |              |
|----------------|---------------------|---------------------|---------------------|--------------------------------------------------|--------------|
| Proteobacteria | Gammaproteobacteria | Oceanospirillales   | Halomonadaceae      | <i>Halomonadaceae</i> bacterium T82-2            | KXS37198     |
| Proteobacteria | Gammaproteobacteria | Oceanospirillales   | Oleiphilaceae       | <i>Oleiphilus</i>                                | WP_068739908 |
| Proteobacteria | Gammaproteobacteria | Orbales             | Orbaceae            | <i>Gilliamella apicola</i>                       | WP_065613607 |
| Proteobacteria | Gammaproteobacteria | Thiotrichales       | Thiotrichaceae      | <i>Thiothrix lacustris</i>                       | WP_028490072 |
| Proteobacteria | Gammaproteobacteria | Vibrionales         | Vibrionaceae        | <i>Vibrio parahaemolyticus</i>                   | WP_025551667 |
| Proteobacteria | Deltaproteobacteria | Bdellovibrionales   | unclassified        | <i>Bdellovibrionales</i> bacterium<br>GWA2_49_15 | OFZ13379     |
| Proteobacteria | Deltaproteobacteria | Desulfobacterales   | Desulfobacteraceae  | <i>Desulfotignum phosphitoxidans</i>             | WP_006968875 |
| Proteobacteria | Deltaproteobacteria | Desulfobacterales   | Desulfobulbaceae    | <i>Desulfobulbaceae</i> bacterium<br>BRH_c16a    | KJS03538     |
| Proteobacteria | Deltaproteobacteria | Desulfovibrionales  | Desulfohalobiaceae  | <i>Desulfonatronovibrio magnus</i>               | WP_052507323 |
| Proteobacteria | Deltaproteobacteria | Desulfovibrionales  | Desulfomicrobiaceae | <i>Desulfomicrobium escambiense</i>              | WP_051306881 |
| Proteobacteria | Deltaproteobacteria | Desulfovibrionales  | Desulfonatronaceae  | <i>Desulfonatronum thioautotrophicum</i>         | WP_052813169 |
| Proteobacteria | Deltaproteobacteria | Desulfovibrionales  | Desulfovibrionaceae | <i>Halodesulfovibrio aestuarii</i>               | WP_020001911 |
| Proteobacteria | Deltaproteobacteria | Desulfuromonadales  | Desulfuromonadaceae | <i>Pelobacter carbinolicus</i>                   | WP_011339968 |
| Proteobacteria | Deltaproteobacteria | Desulfuromonadales  | Geobacteraceae      | <i>Geobacter anodireducens</i>                   | WP_066357589 |
| Proteobacteria | Deltaproteobacteria | Myxococcales        | Cystobacteraceae    | <i>Cystobacter violaceus</i>                     | WP_043403759 |
| Proteobacteria | Deltaproteobacteria | Syntrophobacterales | Syntrophaceae       | <i>Syntrophus</i> sp.<br>RIFOXYC2_FULL_54_9      | OHE31986     |
| Actinobacteria | Rubrobacteria       | Rubrobacterales     | Rubrobacteraceae    | <i>Rubrobacter radiotolerans</i>                 | AHY45647     |
| Actinobacteria | Actinobacteria      | Streptomycetales    | Streptomycetaceae   | <i>Streptomyces pristinaespiralis</i>            | WP_053557345 |
| Actinobacteria | Actinobacteria      | Geodermatophilales  | Geodermatophilaceae | <i>Blastococcus saxosidens</i>                   | WP_014377222 |
| Actinobacteria | Actinobacteria      | Frankiales          | Frankiaceae         | <i>Frankia inefficax</i>                         | WP_013424985 |
| Actinobacteria | Actinobacteria      | Kineosporiales      | Kineosporiaceae     | <i>Kineococcus radiotolerans</i>                 | WP_012084822 |
| Actinobacteria | Actinobacteria      | Micrococcales       | Microbacteriaceae   | <i>Microbacterium</i> sp. SUBG005                | KEP73612     |

|                |                 |                     |                      |                                                      |              |
|----------------|-----------------|---------------------|----------------------|------------------------------------------------------|--------------|
| Actinobacteria | Actinobacteria  | Micrococcales       | Micrococcaceae       | <i>Arthrobacter</i> sp. Leaf137                      | WP_056082307 |
| Actinobacteria | Actinobacteria  | Propionibacteriales | Nocardioideaceae     | <i>Actinopolymorpha singaporensis</i>                | SDR88613     |
| Actinobacteria | Actinobacteria  | Streptosporangiales | Streptosporangiaceae | <i>Herbidospora cretacea</i>                         | WP_051759891 |
| Actinobacteria | Actinobacteria  | Streptosporangiales | Nocardiopsaceae      | <i>Nocardiopsis valliformis</i>                      | WP_017578716 |
| Actinobacteria | Actinobacteria  | Streptosporangiales | Thermomonosporaceae  | <i>Actinomadura rubrobrunea</i>                      | WP_067908863 |
| Actinobacteria | Actinobacteria  | Micromonosporales   | Micromonosporaceae   | <i>Micromonospora rhizosphaerae</i>                  | SCL20333     |
| Actinobacteria | Actinobacteria  | Pseudonocardiales   | Pseudonocardiaceae   | <i>Saccharothrix espanaensis</i>                     | WP_051075824 |
| Actinobacteria | Actinobacteria  | Corynebacteriales   | Nocardiaceae         | <i>Nocardia tenerifensis</i>                         | WP_051187150 |
| Actinobacteria | Actinobacteria  | Corynebacteriales   | Mycobacteriaceae     | <i>Mycobacterium smegmatis</i>                       | WP_014877012 |
| Bacteroidetes  | Bacteroidia     | Bacteroidales       | Bacteroidaceae       | <i>Bacteroides salyersiae</i>                        | WP_005930485 |
| Bacteroidetes  | Bacteroidia     | Bacteroidales       | Marinilabiaceae      | <i>Marinilabilia salmonicolor</i>                    | WP_010662388 |
| Bacteroidetes  | Bacteroidia     | Bacteroidales       | Porphyromonadaceae   | <i>Dysgonomonas</i> sp. BGC7                         | WP_050699841 |
| Bacteroidetes  | Bacteroidia     | Bacteroidales       | Prolixibacteraceae   | <i>Draconibacterium orientale</i>                    | WP_051567711 |
| Bacteroidetes  | Bacteroidia     | Bacteroidales       | Prevotellaceae       | <i>Prevotella</i> sp. P6B4                           | WP_028903769 |
| Bacteroidetes  | Flavobacteriia  | Flavobacteriales    | Crocinitomicaceae    | <i>Fluviicola</i> sp.<br>RIFCSPHIGHO2_02_FULL_43_260 | OGS76951     |
| Bacteroidetes  | Flavobacteriia  | Flavobacteriales    | Flavobacteriaceae    | <i>Flavobacterium filum</i>                          | WP_051220749 |
| Bacteroidetes  | Sphingobacteria | Sphingobacteriales  | Sphingobacteriaceae  | <i>Pedobacter</i> sp. CCM 8644                       | WP_068823013 |
| Bacteroidetes  | Sphingobacteria | Sphingobacteriales  | Saprospiraceae       | <i>Saprospira grandis</i>                            | WP_002658428 |
| Bacteroidetes  | Cytophagia      | Cytophagales        | Hymenobacteraceae    | <i>Hymenobacter</i> sp. MIMtkLc17                    | WP_052732857 |
| Bacteroidetes  | Cytophagia      | Cytophagales        | Cyclobacteriaceae    | <i>Algoriphagus machipongonensis</i>                 | WP_008200678 |
| Bacteroidetes  | Cytophagia      | Cytophagales        | Cytophagaceae        | <i>Rufibacter tibetensis</i>                         | WP_062543367 |
| Bacteroidetes  | Cytophagia      | Cytophagales        | Flammeovirgaceae     | <i>Roseivirga spongicola</i>                         | WP_068216431 |
| Bacteroidetes  | Rhodothermia    | Rhodothermales      | Rhodothermaceae      | <i>Salinibacter ruber</i>                            | WP_011403317 |
| Bacteroidetes  | Balneolia       | Balneolales         | Balneolaceae         | <i>Balneola</i> sp. EhC07                            | WP_066221814 |

|                |                       |                        |                          |                                        |              |
|----------------|-----------------------|------------------------|--------------------------|----------------------------------------|--------------|
| Cyanobacteria  | Oscillatoriophycideae | Oscillatoriales        | Gomontiellaceae          | <i>Crinalium epipsammum</i>            | WP_015202527 |
| Cyanobacteria  | Oscillatoriophycideae | Oscillatoriales        | Microcoleaceae           | <i>Planktothrix rubescens</i>          | WP_026788000 |
| Cyanobacteria  | Oscillatoriophycideae | Oscillatoriales        | Oscillatoriaceae         | <i>Lyngbya confervoides</i>            | WP_052288534 |
| Cyanobacteria  | Oscillatoriophycideae | Chroococcales          | Aphanothecaceae          | <i>Crocospaera watsonii</i>            | WP_007312075 |
| Cyanobacteria  | Oscillatoriophycideae | Chroococcales          | Microcystaceae           | <i>Microcystis aeruginosa</i>          | WP_066030138 |
| Cyanobacteria  |                       | Nostocales             | Aphanizomenonaceae       | <i>Aphanizomenon flos-aquae</i>        | WP_027404587 |
| Cyanobacteria  |                       | Nostocales             | Hapalosiphonaceae        | <i>Fischerella</i> sp. PCC 9605        | WP_035140596 |
| Cyanobacteria  |                       | Nostocales             | Nostocaceae              | <i>Nostoc</i> sp. KVJ20                | WP_069068098 |
| Cyanobacteria  |                       | Nostocales             | Symphyonemataceae        | <i>Mastigocladopsis repens</i>         | WP_017315877 |
| Cyanobacteria  |                       | Nostocales             | Tolypothrichaceae        | <i>Tolypothrix bouteillei</i>          | WP_038072579 |
| Cyanobacteria  |                       | Synechococcales        | Leptolyngbyaceae         | <i>Leptolyngbya</i> sp. Heron Island J | WP_023071809 |
| Cyanobacteria  |                       | Synechococcales        | Pseudanabaenaceae        | <i>Pseudanabaena</i> sp. PCC 6802      | WP_019500934 |
| Cyanobacteria  |                       | Synechococcales        | Synechococcaceae         | <i>Synechococcus</i> sp. PCC 8807      | WP_065717476 |
| Firmicutes     | Clostridia            | Clostridiales          | Clostridaceae            | <i>Alkaliphilus transvaalensis</i>     | WP_026477587 |
| Firmicutes     | Clostridia            | Clostridiales          | Peptostreptococcaceae    | <i>Desulfotomaculum kuznetsovii</i>    | WP_013821698 |
| Firmicutes     | Clostridia            | Clostridiales          | Peptococcaceae           | <i>Fusibacter</i> sp. 3D3              | WP_069875450 |
| Firmicutes     | Clostridia            | Clostridiales          | Syntrophomonadaceae      | <i>Syntrophomonas palmitatica</i>      | WP_054693267 |
| Firmicutes     | Clostridia            | Thermoanaerobacterales | Thermoanaerobacteriaceae | <i>Thermacetogenium phaeum</i>         | WP_015050782 |
| Firmicutes     | Bacilli               | Bacillales             | Bacillaceae              | <i>Bacillus cohnii</i>                 | WP_066411193 |
| Firmicutes     | Bacilli               | Bacillales             | Paenibacillaceae         | <i>Paenibacillus</i> sp. DMB20         | WP_046678394 |
| Firmicutes     | Bacilli               | Bacillales             | Planococcaceae           | [ <i>Bacillus</i> ] <i>aminovorans</i> | WP_063974911 |
| Chloroflexi    | Chloroflexia          | Herpetosiphonales      | Herpetosiphonaceae       | <i>Herpetosiphon geysericola</i>       | WP_054535302 |
| Chloroflexi    | Chloroflexia          | Chloroflexales         | Oscillochloridaceae      | <i>Candidatus Chloroploca asiatica</i> | WP_097655259 |
| Chloroflexi    | Anaerolineae          | Anaerolineales         | Anaerolineaceae          | <i>Anaerolinea thermolimosa</i>        | WP_062196486 |
| Planctomycetes | Planctomycetacia      | Brocadiales            | Brocadiaceae             | <i>Candidatus Brocadia sinica</i>      | WP_052562946 |



|                     |                  |                    |                     |                                                 |              |
|---------------------|------------------|--------------------|---------------------|-------------------------------------------------|--------------|
| Planctomycetes      | Planctomycetacia | Planctomycetales   | Planctomycetaceae   | <i>Rhodopirellula maiorica</i>                  | WP_040764095 |
| Planctomycetes      | Planctomycetacia | Planctomycetales   | Isosphaeraceae      | <i>Singulisphaera sp. GP187</i>                 | WP_083670156 |
| Planctomycetes      | Planctomycetacia | Planctomycetales   | Gemmataceae         | <i>Gemmata sp. SH-PL17</i>                      | WP_082838880 |
| Planctomycetes      | Planctomycetia   | unclassified       | unclassified        | <i>Planctomycetia bacterium 21-64-5</i>         | OYV96022     |
| Verrucomicrobia     | Verrucomicrobiae | Verrucomicrobiales | Verrucomicrobiaceae | <i>Verrucomicrobium sp. BvORR034</i>            | WP_050026552 |
| Verrucomicrobia     | Verrucomicrobiae | Verrucomicrobiales | Rubritaleaceae      | <i>Rubritalea marina</i>                        | WP_018969043 |
| Verrucomicrobia     | Opitutae         | unclassified       | unclassified        | <i>Opitutae bacterium Tous-CITDCM</i>           | PAW63037     |
| Acidobacteria       | Holophagae       | Holophagales       | Holophagaceae       | <i>Holophaga foetida</i>                        | WP_026939014 |
| Nitrospirae         | unclassified     | unclassified       | unclassified        | Nitrospirae bacterium GWC2_57_9                 | OGW47409     |
| Deinococcus-Thermus | Deinococci       | Thermales          | Thermaceae          | <i>Meiothermus timidus</i>                      | WP_084784957 |
|                     | Deinococci       | Deinococcales      | Deinococcaceae      | <i>Deinococcus sp. NW-56</i>                    | WP_104989995 |
| Balneolaeta         | Balneolia        | Balneolales        | Balneolaceae        | <i>Balneola sp. EhC07</i>                       | WP_066221814 |
| Rhodothermaeota     | Rhodothermia     | Rhodothermales     | Rubricoccaceae      | <i>Rubrivirga marina</i>                        | WP_095509486 |
| Lentisphaerae       | unclassified     | unclassified       | unclassified        | Lentisphaerae bacterium<br>RIFOXYC12_FULL_60_16 | OGV61158     |

ScoMcrA–SBD homologues were found in at least fourteen bacterial phyla: proteobacteria, actinobacteria, bacteroidetes, firmicutes, cyanobacteria, chloroflexi, planctomycetes, verrucomicrobia, acidobacteria, nitrospirae, deinococcus-thermus, rhodothermaeota, balneolaeta, and lentisphaerae. The names of phyla, classes, orders, and families in which proteins containing ScoMcrA–SBD-like domains were found by BLAST search are listed, as well as the names of representative organisms and the accession numbers of representative ScoMcrA–SBD-like proteins.

**Supplementary Table 3. Representative ScoMcrA–SBD homologues used for multiple sequence alignment in Supplementary Fig. 15.**

|    | Phylum          | Class                 | Order                   | Family                  | Organism                                   | Protein      |
|----|-----------------|-----------------------|-------------------------|-------------------------|--------------------------------------------|--------------|
| 1  | Actinobacteria  | Actinobacteria        | Streptomycetales        | Streptomycetaceae       | <i>Streptomyces coelicolor</i>             | ScoMcrA      |
| 2  | Actinobacteria  | Actinobacteria        | Streptomycetales        | Streptomycetaceae       | <i>Streptomyces gancidicus</i>             | WP_006134840 |
| 3  | Actinobacteria  | Actinobacteria        | Streptomycetales        | Streptomycetaceae       | <i>Streptomyces hygrosopicus</i>           | WP_014674231 |
| 4  | Actinobacteria  | Actinobacteria        | Streptosporangiales     | Nocardiopsaceae         | <i>Nocardiopsis dassonvillei</i>           | WP_013156064 |
| 5  | Proteobacteria  | Gammaproteobacteria   | Enterobacteriales       | Enterobacteriaceae      | <i>Escherichia coli</i>                    | WP_000199891 |
| 6  | Proteobacteria  | Gammaproteobacteria   | Enterobacteriales       | Morganellaceae          | <i>Morganella morganii</i>                 | WP_032098169 |
| 7  | Proteobacteria  | Gammaproteobacteria   | Enterobacteriales       | Enterobacteriaceae      | <i>Salmonella enterica</i>                 | WP_061382821 |
| 8  | Proteobacteria  | Gammaproteobacteria   | Vibrionales             | Vibrionaceae            | <i>Vibrio cholerae</i>                     | WP_001896471 |
| 9  | Proteobacteria  | Gammaproteobacteria   | Alteromonadales         | Shewanellaceae          | <i>Shewanella violacea</i>                 | WP_013051377 |
| 10 | Proteobacteria  | Betaproteobacteria    | Neisseriales            | Neisseriaceae           | <i>Eikenella corrodens</i>                 | WP_003822245 |
| 11 | Proteobacteria  | Deltaproteobacteria   | Desulfuromonadales      | Geobacteraceae          | <i>Geobacter sulfurreducens</i>            | WP_045668470 |
| 12 | Firmicutes      | Bacilli               | Bacillales              | Bacillaceae             | <i>Bacillus megaterium</i>                 | WP_013083516 |
| 13 | Firmicutes      | Clostridia            | Clostridiales           | Clostridaceae           | <i>Alkaliphilus metalliredigens</i>        | WP_012063279 |
| 14 | Cyanobacteria   |                       | Nostocales              | Aphanizomenonaceae      | <i>Nodularia spumigena</i>                 | WP_006195419 |
| 15 | Cyanobacteria   | Oscillatoriothycideae | Oscillatoriales         | Microcoleaceae          | <i>Arthrospira maxima</i>                  | WP_006670171 |
| 16 | Cyanobacteria   |                       | Synechococcales         | Synechococcaceae        | <i>Synechococcus</i> sp. PCC 7117          | WP_065711998 |
| 17 | Chloroflexi     | Chloroflexia          | Herpetosiphonales       | Herpetosiphonaceae      | <i>Herpetosiphon aurantiacus</i> DSM 785   | ABX03229     |
| 18 | Bacteroidetes   | Bacteroidia           | Bacteroidales           | Bacteroidaceae          | <i>Bacteroides fragilis</i>                | WP_005785611 |
| 19 | Bacteroidetes   | Bacteroidia           | Bacteroidales           | Prevotellaceae          | <i>Prevotella ruminicola</i>               | WP_041385766 |
| 20 | Bacteroidetes   | Cytophagia            | Cytophagales            | Cytophagaceae           | <i>Flexibacter litoralis</i>               | WP_014797641 |
| 21 | Planctomycetes  | Planctomycetacia      | Candidatus Brocadiiales | Candidatus Brocadiaceae | <i>Candidatus Kuenenia stuttgartiensis</i> | CAJ72745     |
| 22 | Verrucomicrobia | Verrucomicrobiae      | Verrucomicrobiales      | Verrucomicrobiaceae     | <i>Verrucomicrobium</i> sp. BvORR034       | WP_050026552 |

---

|    |               |            |              |               |                          |              |
|----|---------------|------------|--------------|---------------|--------------------------|--------------|
| 23 | Acidobacteria | Holophagae | Holophagales | Holophagaceae | <i>Holophaga foetida</i> | WP_026939014 |
|----|---------------|------------|--------------|---------------|--------------------------|--------------|

---

The names of the organisms they originate from, as well as the phylum, class, order, and family which each organism belongs to, are listed.

**Supplementary Table 4. Strains, plasmids, primers and oligonucleotides used in this study.**

| Name                    | Description                                                                                                                                                                                                                                             | Source or references              |
|-------------------------|---------------------------------------------------------------------------------------------------------------------------------------------------------------------------------------------------------------------------------------------------------|-----------------------------------|
| <i>Escherichia coli</i> |                                                                                                                                                                                                                                                         |                                   |
| DH10B                   | F <sup>-</sup> <i>mcrA</i> Δ( <i>mrr</i> - <i>hsdRMS</i> - <i>mcrBC</i> ) φ80 <i>lacZ</i> ΔM15 Δ <i>lacX74</i> <i>recA1</i> <i>endA1</i> <i>araD139</i> Δ( <i>ara</i> , <i>leu</i> )7697 <i>galU</i> <i>galK</i> λ <sup>-</sup> <i>rpsL</i> <i>nupG</i> | Thermo Fisher                     |
| BL21(DE3)               | F <sup>-</sup> <i>ompT</i> <i>hsdS<sub>b</sub></i> ( <i>r<sub>b</sub></i> <sup>-</sup> (2) <i>m<sub>b</sub></i> <sup>-</sup> ) <i>gal dcm</i> (DE3) pLysE                                                                                               | Novagen                           |
| Plasmid                 |                                                                                                                                                                                                                                                         |                                   |
| pSJ8                    | pET43.1a derived protein expression vector, MBP tag, TEV protease cleavage site (ENLYFQG), Ampicillin resistance                                                                                                                                        | Dr. Jiahai Zhou, unpublished data |
| pJTU1660                | pSJ8 derivative for heterologous expression and purification of ScoMcrA                                                                                                                                                                                 | This study                        |
| pJTU1668                | pSJ8 derivative for heterologous expression and purification of SBD-SRA                                                                                                                                                                                 | This study                        |
| pJTU1669                | pSJ8 derivative for heterologous expression and purification of SBD                                                                                                                                                                                     | This study                        |
| pJTU1670                | pSJ8 derivative for heterologous expression and purification of SBD domain of <i>E. coli</i> homolog                                                                                                                                                    | This study                        |
| pJTU1671                | pSJ8 derivative for heterologous expression and purification of SBD domain of <i>M. morgani</i> homolog                                                                                                                                                 | This study                        |
| pJTU1672                | pSJ8 derivative for heterologous expression and purification of full-length <i>S. gancidicus</i> homolog                                                                                                                                                | This study                        |
| pSBD-H116I              | a mutant of pJTU1669 with the product of H116I                                                                                                                                                                                                          | This study                        |
| pSBD-R117A              | a mutant of pJTU1669 with the product of R117A                                                                                                                                                                                                          | This study                        |
| pSBD-R117G              | a mutant of pJTU1669 with the product of R117G                                                                                                                                                                                                          | This study                        |
| pSBD-Y164I              | a mutant of pJTU1669 with the product of Y164I                                                                                                                                                                                                          | This study                        |
| pSBD-P165N              | a mutant of pJTU1669 with the product of P165N                                                                                                                                                                                                          | This study                        |
| pSBD-A168G              | a mutant of pJTU1669 with the product of A168G                                                                                                                                                                                                          | This study                        |
| pSBD-A168I              | a mutant of pJTU1669 with the product of A168I                                                                                                                                                                                                          | This study                        |
| pSBD-Y164F              | a mutant of pJTU1669 with the product of Y164F                                                                                                                                                                                                          | This study                        |

|                                |                                                                                                                                                                                                                       |                 |
|--------------------------------|-----------------------------------------------------------------------------------------------------------------------------------------------------------------------------------------------------------------------|-----------------|
| pSBD-S187A                     | a mutant of pJTU1669 with the product of S187A                                                                                                                                                                        | This study      |
| pSBD-R191A                     | a mutant of pJTU1669 with the product of R191A                                                                                                                                                                        | This study      |
| pBluescript II SK <sup>+</sup> | Standard cloning vector, Ampicillin resistance, <i>colE1</i> origin                                                                                                                                                   | Stratagene      |
| pJTU1238                       | pBluescript II SK <sup>+</sup> derivative carrying the <i>dnd</i> gene cluster from <i>Salmonella enterica</i> serovar Cerro 87 which makes PT modification in the pattern of G <sub>PS</sub> AAC/G <sub>PS</sub> TTC | Xu et al., 2010 |
| pACYCDuet <sup>TM</sup> -1     | coexpression vector, compatible with pBluescript II SK <sup>+</sup> , chloramphenicol resistance, P15A origin                                                                                                         | Novagen         |
| pJTU1673                       | pACYCDuet <sup>TM</sup> -1 derivative carrying full-length <i>E. coli</i> homolog with promoter                                                                                                                       | This study      |
| pJTU1674                       | pACYCDuet <sup>TM</sup> -1 derivative carrying full-length <i>M. morgani</i> homolog with <i>E. coli</i> promoter                                                                                                     | This study      |
| pJTU1675                       | pACYCDuet <sup>TM</sup> -1 derivative carrying full-length <i>S. gancidicus</i> homolog with <i>E. coli</i> promoter                                                                                                  | This study      |

---

Primers

---

|           |                               |
|-----------|-------------------------------|
| ScoFL-F   | AAAGATCTGCACCTTCGGAGATCACTCGT |
| ScoFL-R   | TTGAATTCTCACTGGAGTTTCTCTTCGTG |
| SBD-F     | AAGGATCCAGGGAGGCCCCCAA        |
| SBD-R     | AAGAATTCTCACGGCCGCAGAGCAT     |
| SBDSRA-F  | AAAGATCTAGGGAGGCCCCCAA        |
| SBDSRA-R  | AAGAATTCTCATCGCCTGTAAGCTT     |
| Eco-SBD-F | AAGGATCCACCTCTGACAAAACCCT     |
| Eco-SBD-R | TTGAATTCTCAGCGAAACTTCGGATCGCG |
| Mmo-SBD-F | AAGGATCCATTAGCCCGGAAAC        |
| Mmo-SBD-R | TTGAATTCTCAACGGAAATGCGGATCGCG |
| Sga-F     | AAGGATCCGGCGCAGAAGCTGG        |
| Sga-R     | TTGAATTCTTAGCTGGCCGCCGGT      |
| H116I-F   | GTCCAGCCCTCATCCGCCCCGTTCT     |
| H116I-R   | AGAACGGGGCGGATGAGGGCTGGAC     |
| R117A-F   | CAGCCCTCCACGCCCCCGTTCTTCT     |

|         |                                                |
|---------|------------------------------------------------|
| R117A-R | AGAAGAACGGGGGCGTGGAGGGCTG                      |
| R117G-F | CAGCCCTCCACGGCCCCGTTCTTCT                      |
| R117G-R | AGAAGAACGGGGCCGTGGAGGGCTG                      |
| Y164I-F | ATGGGGTGCGCATCCCATTCTGGGC                      |
| Y164I-R | GCCCAGAATGGGATGCGCACCCCAT                      |
| P165N-F | GGGTGCGCTACAATTTCTGGGCCCT                      |
| P165N-R | AGGGCCCAGAAATTGTAGCGCACCC                      |
| A168G-F | ACCCATTCTGGGGCCTCGTGCGCGA                      |
| A168G-R | TCGCGCACGAGGCCCCAGAATGGGT                      |
| A168I-F | ACCCATTCTGGATCCTCGTGCGCGA                      |
| A168I-R | TCGCGCACGAGGATCCAGAATGGGT                      |
| Y164F-F | ATGGGGTGCGCTTCCCATTCTGGGC                      |
| Y164F-R | GCCCAGAATGGGAAGCGCACCCCAT                      |
| S187A-F | CACTCTGACTGCTCGAGGGCGTCGC                      |
| S187A-R | GCGACGCCCTCGAGCAGTCAGAGTG                      |
| R191A-F | AGTCGAGGGCGTGCCCCACCCTGG                       |
| R191A-R | CCAGGGTGGGGGCACGCCCTCGACT                      |
| EcoHE-F | GCTACGGGTGATGGGTTATGAC                         |
| EcoHE-R | TTGAATTCTCAATGCTCTCCTCTG                       |
| P-Mmo-R | GCAGGGTTTCCGGGCTAATCATTGCGTTGGAGAATCCATGGGCACA |
| MmoHE-F | ATGATTAGCCCGGAAACCCTGC                         |
| MmoHE-R | TTGAATTCTCAGACTTTGAAAAC                        |
| P-Sga-R | TTTACCAGCTTCTGCGCCCATGCGTTGGAGAATCCATGGGCACA   |
| SgaHE-F | ATGGGCGCAGAAGCTGGTGAAA                         |
| SgaHE-R | TTGAATTCTTAGCTGGCCGCCGGT                       |

---

Oligonucleotides

---



---

|             |                                                                 |
|-------------|-----------------------------------------------------------------|
| GGCC10      | CCCG <sub>PS</sub> GCCGGG                                       |
| GGCC8       | CCG <sub>PS</sub> GCCGG                                         |
| GAAC-S      | GGCG <sub>PS</sub> AACGTG                                       |
| GAAC-A      | CACG <sub>PS</sub> TTCGCC                                       |
| GATC-S      | GATG <sub>PS</sub> ATCCTA                                       |
| GATC-A      | TAGG <sub>PS</sub> ATCATC                                       |
| S10hemi-S   | CCCG <sub>PS</sub> GCCGCC                                       |
| U10hemi-S   | CCCGGCCGCC                                                      |
| U10hemi-A   | GGCGGCCGGG                                                      |
| CUThemi-s1  | GGGCGAGTAATCCCAGGATTACTCCCGCGGCTTCGAC                           |
| CUThemi-s2  | CCCG <sub>PS</sub> GCCGCCGT                                     |
| CUThemi-s3  | CGCCGCGTACGTACCCGACCCCCGCCGTACGTACCCGGGATGACGTACGGCGGGGG<br>G   |
| CUThemi-a1  | GGGTCGAAGCCGCGGGAGTAATCCTGGGATTACTCGCCC                         |
| CUThemi-a2  | GGCG <sub>PS</sub> GCCG                                         |
| CUThemi-a3  | CCCCCGCCGTACGTACATCCCGGTGACGTACGGCGGGGGTCGGTGACGTACGCGGCG<br>AC |
| CUThemi-s2U | CCCGGCCGCCGT                                                    |
| CUThemi-a2U | GGCGGCCG                                                        |

---

**Supplementary Table 5. Codon optimized DNA sequences.**

---

Codon optimized DNA sequence of *M. morganii* ScoMcrA homolog (WP\_032098169)

ATGATTAGCCCGAAACCCTGCAGTCTGCGATTGCCAGCATCTCTGTGTGGCGCCAAGGCGATGTTTGC GCGCCGCATAAACCGCTGCTGCTGCTGTATGTTTC  
TGTCACAGTACAAAGCCGGCCATCCGCGCCTGTTTAATTATGGTTCGTGAAATCCACGAACCGCTGACCCGCTCTGCTGCGCGAATTTGGTCCGAAACGTCGCA  
CGGATTACCCGAACATGCCGTTTTGGCGTCTGCGCAGTGATTCCTTCTGGGAAATTACGGACGCGGAAGGCTGTAAACATCGTCGCGGTAACACCCAGCCGA  
CGAAAAAGAAGTATCGATAATCACGTCTCAGGCGGTTTTGACGAAGCGGCCTATCGTCAGCTGCGCGAACATCCGGAAGTATTGATAAACTGGCACAG  
CAAATCCTGACCAACCGCTTCCCAGGAATCGATTACAGCGTATCCTGGCTAATCAACTGGGCCTGGATTTTGTGCGACCGTACGAAAAACCGCGATCCGCATTTCC  
GTGACATTATCCTGCGCGCTATCACAGCCGTTGCGCCTTTTGTGGTTACGATCTGCGTCTGGACGGTGCCTGGTGGGTATTGAAGCAGCTCATATCCACTG  
GAAAGCGTATGGCGGCCCGTGCCTGGTTCACAATGGCCTGGCTCTGTGTAGTCTGCATCACGATGCATTTGACATGGGCGCTTTCGGTCTGGATAAAAACCT  
GACCATTTCGTATCTCCGCCGGCGTGTACGTTTCGCCGGTTCGTGGATAACCTGTTTTGGCAGCGCAATGGTCAACTGCTGCATCTGCCGCACGACGAATCTCTG  
TGGCCGGCAGAACAGTACATTGGTTGGCATCGTAAACAAGTTTTCAAAGTCTGA

---

Codon optimized DNA sequence of *M. morganii* ScoMcrA homolog (WP\_032098169)

ATGGGCGCAGAAGCTGGTGAACCTGCACCACGGCGGCCCTGTGTATGTATGATCTGAGCTACCGTCCGACGTCTCTGCCGCGTATGGGTCTGGGTGACATT  
CGTCATGAACACGTGATCGCAGCTACCGAAGAATTTTCGTCGCCTGGGTCGTGAAGAATTTCTGCGCACGTATGGCTTCGGTTCGTGCGCGCTCATACCAGCTG  
GTTCTGGATGGCCGTCGCTATGACTCGAAAGCGATTGCCGGCGTGCACATGGTTACGCTACCGGCGATTTTCTGAGTGCAGCAGACTTCTCCGGCGGTGCA  
GCTACCGTTCGCACGTTGCCTGCGCGAACTGGGTTTTCTGGTTGAAACGGGTGCACCGAGTGATAACCGTGCAGGTCTGCTGGCACGTCTGCGTCAGCTGCG  
TGTTAGCCGTGGTCCGGGTAATCCGGCACCGAGCCGTCATCAACCGCTGTCTCTGCTGTGGGCAATGGCTCGTGCAGCAGATGACCGTCCGCGTCTGACCCC  
GTGGCCGACGTTTCGCGATGAAGTTGGTCCGCTGCTGGTTGAATTTGGCCTGCCGAACCGGAAAGCCACCCCGGAATATCCGTTTTGGCACCTGCAGGGTTC  
TGAAGTGTGGGAAGTGCCTGGCATCCCGGCAGAACTGGCTATGCGCATGCCGAACGTTGGTCTGTTAATGAACATACCCGCAAGCAGGTTTCACCGCAG  
AAACGGCAGATCTGCTGTGCGACCCGGTGACCCGTCTGGAAGCAATTGCTACCATCTGTGAAACGTATCTGGGCGATATTGACCGTCAGGCGCTGTTCTCAC  
GCATCGGCCTGTGCGGTTACACCACGGCCGGGTCGCTGACCCCGTGGGCGAAGAACCGGGCGGTGCTGATACGGACGAATATGGTTCGACGCGCAGG  
TCCGGTCCGCGTCGCGAAGCCACCCGTTCTGTCAATTGTGCGCGATGAAGCGCTGGCCCGTAAAGTCAAAGAAGTGAAGATGACCGCTGCCAAGTGTGTG  
ATACCGCACTGCGTTATCTGAATCGCCCGTACAGTGAAGCAGCTCATATCCGCGGCCTGGTTCGCCGCATCACGGTCCGGATGAACTGCAAAACCTGCTGT  
GCCTGTGTGCGAATTGCCACGTGCTGTTTGTGGTCTGGAAATTTATGTGGACACCGAAGGTCTGGTTCGTGGTACGCGTGGTATCGTGCACCGCGTCCGC  
TGCGTCGCGCACCGGGTTCATCCGATCGATGAAGCGCATGTTGCCTACCACCGTGACCTGTGTAACCTGAATGCCCGCAAACCGGCGGCCAGCTAA

---

## Supplementary References

1. Shen, B. W., Landthaler, M., Shub, D. A. & Stoddard, B. L. DNA binding and cleavage by the HNH homing endonuclease I-HmuI. *J. Mol. Biol.* **342**, 43-56 (2004).
2. Shen, B. W., *et al.* Unusual target site disruption by the rare-cutting HNH restriction endonuclease PacI. *Structure* **18**, 734-43 (2010).
3. Xu, S. Y. & Gupta, Y. K. Natural zinc ribbon HNH endonucleases and engineered zinc finger nicking endonuclease. *Nucleic Acids Res.* **41**, 378-90 (2013).
